# Supplementary material
Source: PubMed Central journal article supplement (PMC5374030)
Supplement: NIHMS846187-supplement-1.pdf [file NIHMS846187-supplement-1.pdf]

**Meta-analysis of genome-wide association studies identifies three novel loci  
for saturated fatty acids in East Asians**

Jingwen Zhu <sup>1</sup>, Ani Manichaikul <sup>2,3</sup>, Yao Hu <sup>1</sup>, Yii-Der I. Chen <sup>4</sup>, Shuang Liang <sup>5</sup>, Lyn M. Steffen <sup>6</sup>, Stephen S. Rich <sup>2</sup>, Michael Tsai <sup>5</sup>, David S. Siscovick <sup>7,8</sup>, Rozenn N. Lemaitre <sup>7</sup>, Huaixing Li <sup>1</sup>, Xu Lin <sup>1</sup>

<sup>1</sup> the Key Laboratory of Nutrition and Metabolism, Institute for Nutritional Sciences, Shanghai Institutes for Biological Sciences, Chinese Academy of Sciences, University of the Chinese Academy of Sciences, Shanghai, People's Republic of China

<sup>2</sup> Center for Public Health Genomics, University of Virginia, Charlottesville, Virginia, United States of America

<sup>3</sup> Department of Public Health Sciences, Division of Biostatistics and Epidemiology, University of Virginia, Charlottesville, Virginia, United States of America

<sup>4</sup> Institute for Translational Genomics and Population Sciences, Los Angeles BioMedical Research Institute at Harbor-UCLA Medical Center, Torrance, California, United States of America

<sup>5</sup> Department of Laboratory Medicine & Pathology, University of Minnesota, Minneapolis, Minnesota, United States of America

<sup>6</sup> Division of Epidemiology and Community Health, School of Public Health, University of Minnesota, Minneapolis, Minnesota, United States of America

<sup>7</sup> Cardiovascular Health Research Unit, Department of Medicine, University of Washington, Seattle, Washington, United States of America

<sup>8</sup> Department of Epidemiology, School of Public Health, University of Washington, Seattle, Washington, United States of America

**Corresponding author:**

Xu Lin: Phone: 86-021-54920249, Fax: 86-021-54920249, E-mail: [xlin@sibs.ac.cn](mailto:xlin@sibs.ac.cn) .

**Supplemental Table 1** Genotyping of study populations

|                         | NHAPC                            | MESA                                           |
|-------------------------|----------------------------------|------------------------------------------------|
| Genotyping platform     | Illumina 660W                    | Affymetrix Genome-Wide Human SNP Array 6.0     |
| Individual call rate    | ≥97%                             | >95%                                           |
| SNP call rate           | >95%                             | >95%                                           |
| HWE ( <i>P</i> value)   | ≥1E-06                           | ≥1E-06                                         |
| Software for imputation | IMPUTE v2.2.2                    | IMPUTE version 2.1.0                           |
| HapMap reference        | Phase II - CHB+JPT (release #22) | Phase I and II - CEU+YRI+CHB+JPT (release #22) |
| SNPs for imputation     | 473,679                          | 778,602                                        |
| NCBI Build              | 36                               | 36                                             |
| Minor allele frequency  | ≥0.05                            | ≥0.05                                          |
| Imputation quality      | Info>0.5                         | Oevar > 0.8                                    |

*NHAPC* Nutrition and Health of Aging Population in China study, *MESA* Multi-Ethnic Study of Atherosclerosis study, *SNP* Single nucleotide polymorphism, *HWE* Hardy-Weinberg equilibrium, *Oevar* observed divided by expected variance

**Supplemental Table 2** Comprehensive results for 14:0 with  $P < 5 \times 10^{-6}$ 

| SNP        | Chr | Position  | Nearest gene   | MAF    | Minor allele | Beta (SE)        | P        |
|------------|-----|-----------|----------------|--------|--------------|------------------|----------|
| rs7639264  | 3   | 169427864 | <i>GOLIM4</i>  | 0.0308 | C            | -0.0645 (0.0108) | 2.72E-09 |
| rs11589386 | 1   | 163270086 | <i>LMX1A</i>   | 0.0521 | T            | -0.0337 (0.0058) | 5.08E-09 |
| rs11588114 | 1   | 163272569 | <i>LMX1A</i>   | 0.0521 | A            | -0.0338 (0.0058) | 6.34E-09 |
| rs7515422  | 1   | 163277493 | <i>LMX1A</i>   | 0.0524 | C            | -0.0343 (0.0060) | 8.42E-09 |
| rs7542261  | 1   | 163266474 | <i>LMX1A</i>   | 0.0522 | T            | -0.0336 (0.0058) | 9.17E-09 |
| rs9603955  | 13  | 112511818 | <i>ATP11A</i>  | 0.0398 | A            | -0.0682 (0.0119) | 9.61E-09 |
| rs10076748 | 5   | 149569059 | <i>SLC6A7</i>  | 0.0388 | A            | -0.0755 (0.0132) | 1.09E-08 |
| rs9603957  | 13  | 112522349 | <i>ATP11A</i>  | 0.0342 | T            | -0.0591 (0.0105) | 1.60E-08 |
| rs13378238 | 13  | 112510409 | <i>ATP11A</i>  | 0.0334 | T            | -0.0662 (0.0117) | 1.71E-08 |
| rs11042834 | 11  | 10458998  | <i>AMPD3</i>   | 0.0861 | G            | -0.0311 (0.0057) | 4.33E-08 |
| rs4235304  | 4   | 22900584  | <i>GBA3</i>    | 0.0311 | A            | -0.0726 (0.0133) | 4.66E-08 |
| rs466727   | 20  | 15574740  | <i>MACROD2</i> | 0.0357 | G            | -0.0427 (0.0081) | 1.37E-07 |
| rs6871230  | 5   | 126595483 | <i>MEGF10</i>  | 0.2669 | T            | -0.0185 (0.0035) | 1.46E-07 |
| rs6595752  | 5   | 126593983 | <i>MEGF10</i>  | 0.2623 | T            | -0.0185 (0.0035) | 1.58E-07 |
| rs13092703 | 3   | 169474028 | <i>GOLIM4</i>  | 0.0314 | T            | -0.0376 (0.0072) | 1.64E-07 |
| rs3914953  | 3   | 169423483 | <i>GOLIM4</i>  | 0.0301 | A            | -0.0388 (0.0074) | 1.65E-07 |
| rs10065046 | 5   | 126596938 | <i>MEGF10</i>  | 0.2604 | T            | -0.0181 (0.0035) | 1.77E-07 |
| rs10078274 | 5   | 126596828 | <i>MEGF10</i>  | 0.2607 | G            | -0.0181 (0.0035) | 1.77E-07 |
| rs9832467  | 3   | 169425171 | <i>GOLIM4</i>  | 0.0304 | C            | -0.0382 (0.0073) | 1.81E-07 |
| rs3897034  | 3   | 169422270 | <i>GOLIM4</i>  | 0.0300 | A            | -0.0388 (0.0074) | 1.82E-07 |
| rs9836749  | 3   | 169425614 | <i>GOLIM4</i>  | 0.0304 | A            | -0.0382 (0.0073) | 1.82E-07 |
| rs169061   | 8   | 24851764  | <i>DOCK5</i>   | 0.0528 | A            | -0.052 (0.010)   | 1.89E-07 |
| rs9874286  | 3   | 169425673 | <i>GOLIM4</i>  | 0.0318 | C            | -0.0362 (0.007)  | 1.90E-07 |
| rs7625587  | 3   | 169427940 | <i>GOLIM4</i>  | 0.0305 | T            | -0.038 (0.0073)  | 1.92E-07 |
| rs9836029  | 3   | 169431060 | <i>GOLIM4</i>  | 0.0307 | A            | -0.0375 (0.0072) | 2.21E-07 |
| rs9832017  | 3   | 169424911 | <i>GOLIM4</i>  | 0.0314 | C            | -0.0361 (0.007)  | 2.34E-07 |
| rs9830833  | 3   | 169430326 | <i>GOLIM4</i>  | 0.0312 | T            | -0.0365 (0.0071) | 2.45E-07 |
| rs9851007  | 3   | 169430392 | <i>GOLIM4</i>  | 0.0312 | G            | -0.0365 (0.0071) | 2.50E-07 |
| rs9855657  | 3   | 169430938 | <i>GOLIM4</i>  | 0.0313 | G            | -0.0364 (0.0071) | 2.58E-07 |
| rs10049151 | 3   | 169426277 | <i>GOLIM4</i>  | 0.0313 | T            | -0.0363 (0.0070) | 2.59E-07 |
| rs7624807  | 3   | 169420582 | <i>GOLIM4</i>  | 0.0315 | T            | -0.036 (0.0070)  | 2.68E-07 |
| rs2347331  | 10  | 83727441  | <i>NRG3</i>    | 0.206  | C            | -0.0474 (0.0092) | 2.70E-07 |
| rs2067678  | 3   | 169423008 | <i>GOLIM4</i>  | 0.0312 | G            | -0.0366 (0.0071) | 2.70E-07 |
| rs3844173  | 3   | 169428813 | <i>GOLIM4</i>  | 0.0312 | G            | -0.0366 (0.0071) | 2.70E-07 |
| rs9971329  | 10  | 83725508  | <i>NRG3</i>    | 0.2059 | G            | -0.0474 (0.0092) | 2.73E-07 |
| rs6584425  | 10  | 83721752  | <i>NRG3</i>    | 0.2059 | G            | -0.0474 (0.0092) | 2.75E-07 |
| rs1317281  | 10  | 28371763  | <i>MPP7</i>    | 0.0353 | G            | -0.0578 (0.0112) | 2.77E-07 |
| rs11761021 | 7   | 134504428 | <i>C7orf49</i> | 0.0331 | A            | -0.0505 (0.0098) | 2.85E-07 |
| rs17126072 | 14  | 52577434  | <i>DDHD1</i>   | 0.0661 | A            | -0.0511 (0.010)  | 3.09E-07 |
| rs3914954  | 3   | 169420213 | <i>GOLIM4</i>  | 0.0308 | G            | -0.037 (0.0072)  | 3.10E-07 |
| rs10516222 | 4   | 10770343  | <i>MIST</i>    | 0.0327 | G            | -0.0584 (0.0114) | 3.29E-07 |

---

|            |    |           |                 |        |   |                  |          |
|------------|----|-----------|-----------------|--------|---|------------------|----------|
| rs10478764 | 5  | 126620000 | <i>MEGF10</i>   | 0.2677 | C | -0.0183 (0.0036) | 3.39E-07 |
| rs16852068 | 3  | 16943551  | <i>GOLIM4</i>   | 0.0313 | T | -0.0361 (0.0071) | 3.47E-07 |
| rs2092862  | 10 | 83705418  | <i>NRG3</i>     | 0.2049 | C | -0.0467 (0.0092) | 3.47E-07 |
| rs3844110  | 15 | 88315951  | <i>ZNF710</i>   | 0.0369 | C | -0.0538 (0.0106) | 3.48E-07 |
| rs6880089  | 5  | 126637764 | <i>MEGF10</i>   | 0.2678 | G | -0.0183 (0.0036) | 3.49E-07 |
| rs3913892  | 3  | 169432275 | <i>GOLIM4</i>   | 0.0329 | A | -0.0346 (0.0068) | 3.68E-07 |
| rs7732964  | 5  | 126618702 | <i>MEGF10</i>   | 0.2672 | C | -0.0182 (0.0036) | 3.85E-07 |
| rs4073059  | 8  | 41128525  | <i>SFRP1</i>    | 0.032  | A | -0.0621 (0.0122) | 3.92E-07 |
| rs12320586 | 12 | 97844639  | <i>ANKS1B</i>   | 0.0491 | T | -0.0742 (0.0147) | 4.18E-07 |
| rs4613983  | 8  | 41132087  | <i>SFRP1</i>    | 0.0318 | T | -0.0624 (0.0123) | 4.23E-07 |
| rs1816298  | 3  | 139115751 | <i>CLDN18</i>   | 0.0301 | T | -0.0544 (0.0108) | 4.23E-07 |
| rs16852164 | 3  | 169499673 | <i>GOLIM4</i>   | 0.0310 | G | -0.0356 (0.0071) | 4.67E-07 |
| rs10493329 | 1  | 63030582  | <i>ATG4C</i>    | 0.0345 | G | -0.0542 (0.0108) | 4.93E-07 |
| rs2249120  | 10 | 28366781  | <i>MPP7</i>     | 0.0331 | A | -0.0346 (0.007)  | 6.97E-07 |
| rs11989518 | 8  | 77730209  | <i>ZFHX4</i>    | 0.0452 | G | -0.0309 (0.0062) | 7.44E-07 |
| rs4242231  | 5  | 91830504  | <i>NR2F1</i>    | 0.0333 | T | -0.0334 (0.0067) | 7.46E-07 |
| rs11717191 | 3  | 169511722 | <i>GOLIM4</i>   | 0.0324 | C | -0.0342 (0.0069) | 7.64E-07 |
| rs11109674 | 12 | 97842888  | <i>ANKS1B</i>   | 0.0529 | T | -0.0737 (0.0150) | 8.26E-07 |
| rs1155655  | 7  | 126353264 | <i>GRM8</i>     | 0.0357 | T | -0.0614 (0.0125) | 8.76E-07 |
| rs7720606  | 5  | 126579631 | <i>MEGF10</i>   | 0.2406 | G | -0.0185 (0.0038) | 8.96E-07 |
| rs10478767 | 5  | 126651535 | <i>MEGF10</i>   | 0.3013 | T | -0.0175 (0.0036) | 9.03E-07 |
| rs2144896  | 20 | 16330118  | <i>KIF16B</i>   | 0.0341 | A | -0.0577 (0.0118) | 9.58E-07 |
| rs12340798 | 9  | 8293555   | <i>PTPRD</i>    | 0.0418 | A | -0.0557 (0.0114) | 1.03E-06 |
| rs7959428  | 12 | 97846990  | <i>ANKS1B</i>   | 0.058  | A | -0.0732 (0.0150) | 1.04E-06 |
| rs3734147  | 5  | 126602292 | <i>MEGF10</i>   | 0.2684 | G | -0.0172 (0.0035) | 1.10E-06 |
| rs2972715  | 5  | 121294884 | <i>SRFBP1</i>   | 0.0425 | G | -0.053 (0.0109)  | 1.10E-06 |
| rs10075058 | 5  | 126607106 | <i>MEGF10</i>   | 0.2702 | A | -0.0172 (0.0035) | 1.13E-06 |
| rs6595754  | 5  | 126606437 | <i>MEGF10</i>   | 0.2696 | T | -0.0172 (0.0035) | 1.13E-06 |
| rs13152779 | 4  | 10751896  | <i>MIST</i>     | 0.0354 | G | -0.0634 (0.013)  | 1.14E-06 |
| rs406281   | 11 | 8220759   | <i>LMO1</i>     | 0.04   | T | -0.0505 (0.0104) | 1.15E-06 |
| rs10842362 | 12 | 24547642  | <i>SOX5</i>     | 0.0317 | C | -0.0523 (0.0108) | 1.18E-06 |
| rs10946770 | 6  | 25511411  | <i>LRRC16A</i>  | 0.0453 | G | -0.0397 (0.0082) | 1.22E-06 |
| rs1450558  | 12 | 43509646  | <i>NELL2</i>    | 0.0442 | A | -0.0511 (0.0105) | 1.24E-06 |
| rs331447   | 11 | 36407056  | <i>FLJ14213</i> | 0.0416 | G | -0.0316 (0.0065) | 1.28E-06 |
| rs12513837 | 5  | 126601282 | <i>MEGF10</i>   | 0.2683 | G | -0.0169 (0.0035) | 1.28E-06 |
| rs3991951  | 1  | 222283380 | <i>FBXO28</i>   | 0.0437 | G | -0.0559 (0.0116) | 1.33E-06 |
| rs7283436  | 21 | 14432869  | <i>LIPI</i>     | 0.0358 | A | -0.0672 (0.0139) | 1.34E-06 |
| rs11948670 | 5  | 29690611  | <i>PGBD3P2</i>  | 0.0415 | T | -0.0302 (0.0063) | 1.35E-06 |
| rs1363387  | 5  | 126653943 | <i>MEGF10</i>   | 0.3012 | C | -0.0172 (0.0036) | 1.36E-06 |
| rs7085310  | 10 | 114531019 | <i>VTI1A</i>    | 0.0323 | A | -0.0276 (0.0057) | 1.37E-06 |
| rs581035   | 11 | 36401889  | <i>FLJ14213</i> | 0.0416 | C | -0.0318 (0.0066) | 1.38E-06 |
| rs890261   | 11 | 36402694  | <i>FLJ14213</i> | 0.0425 | T | -0.0315 (0.0065) | 1.43E-06 |
| rs2032834  | 5  | 126654544 | <i>MEGF10</i>   | 0.3013 | A | -0.0171 (0.0036) | 1.44E-06 |
| rs1920219  | 3  | 125094800 | <i>CCDC14</i>   | 0.0391 | C | -0.0548 (0.0114) | 1.59E-06 |

---

|            |    |           |                  |        |   |                  |          |
|------------|----|-----------|------------------|--------|---|------------------|----------|
| rs4836316  | 5  | 126655774 | <i>MEGF10</i>    | 0.3016 | G | -0.017 (0.0035)  | 1.60E-06 |
| rs10490463 | 2  | 53707325  | <i>ASB3</i>      | 0.0955 | C | -0.0271 (0.0056) | 1.61E-06 |
| rs404133   | 11 | 8225627   | <i>LMO1</i>      | 0.0359 | A | -0.0536 (0.0112) | 1.62E-06 |
| rs4331917  | 5  | 29696145  | <i>PGBD3P2</i>   | 0.0386 | G | -0.0293 (0.0061) | 1.65E-06 |
| rs2877101  | 5  | 29671585  | <i>PGBD3P2</i>   | 0.0389 | C | -0.0298 (0.0062) | 1.68E-06 |
| rs2422067  | 10 | 94555764  | <i>CCDC14</i>    | 0.0444 | T | -0.0323 (0.0068) | 1.72E-06 |
| rs7711891  | 5  | 29673250  | <i>PGBD3P2</i>   | 0.0391 | C | -0.0297 (0.0062) | 1.73E-06 |
| rs153087   | 16 | 13126755  | <i>LOC729993</i> | 0.0375 | C | -0.0327 (0.0068) | 1.77E-06 |
| rs11950082 | 5  | 29669558  | <i>PGBD3P2</i>   | 0.0391 | G | -0.0297 (0.0062) | 1.78E-06 |
| rs1560845  | 8  | 77739494  | <i>ZFHX4</i>     | 0.0452 | G | -0.0299 (0.0063) | 1.90E-06 |
| rs1824111  | 5  | 29676572  | <i>PGBD3P2</i>   | 0.0384 | T | -0.0294 (0.0062) | 1.93E-06 |
| rs1115806  | 9  | 8294891   | <i>PTPRD</i>     | 0.0405 | C | -0.0548 (0.0115) | 2.06E-06 |
| rs6980742  | 8  | 77700214  | <i>ZFHX4</i>     | 0.0451 | A | -0.0314 (0.0066) | 2.07E-06 |
| rs4836317  | 5  | 126656670 | <i>MEGF10</i>    | 0.3002 | T | -0.0168 (0.0035) | 2.13E-06 |
| rs1012190  | 21 | 19219264  | <i>TMPRSS15</i>  | 0.0396 | T | -0.031 (0.0065)  | 2.16E-06 |
| rs11808061 | 1  | 238267764 | <i>FMN2</i>      | 0.0859 | C | -0.0481 (0.0102) | 2.21E-06 |
| rs6129939  | 20 | 39848459  | <i>CHD6</i>      | 0.2614 | A | 0.0187 (0.0040)  | 2.26E-06 |
| rs16899249 | 5  | 29690997  | <i>PGBD3P2</i>   | 0.0394 | C | -0.0286 (0.0060) | 2.29E-06 |
| rs7706468  | 5  | 29672231  | <i>PGBD3P2</i>   | 0.0416 | C | -0.0294 (0.0062) | 2.33E-06 |
| rs1570967  | 21 | 19217931  | <i>TMPRSS15</i>  | 0.0399 | A | -0.0277 (0.0059) | 2.37E-06 |
| rs3741506  | 12 | 54438106  | <i>CIP29</i>     | 0.0332 | G | -0.0529 (0.0112) | 2.51E-06 |
| rs6124384  | 20 | 39890579  | <i>CHD6</i>      | 0.2407 | G | 0.0193 (0.0041)  | 2.54E-06 |
| rs1982942  | 15 | 84630057  | <i>AGBL1</i>     | 0.0703 | G | -0.048 (0.0102)  | 2.56E-06 |
| rs4836318  | 5  | 126657011 | <i>MEGF10</i>    | 0.2998 | T | -0.0167 (0.0035) | 2.64E-06 |
| rs11702387 | 21 | 14424783  | <i>LIP1</i>      | 0.0358 | A | -0.0666 (0.0142) | 2.64E-06 |
| rs491921   | 7  | 103165151 | <i>RELN</i>      | 0.0457 | C | -0.0499 (0.0107) | 2.79E-06 |
| rs1912031  | 4  | 22938137  | <i>GBA3</i>      | 0.0319 | A | -0.0526 (0.0112) | 2.80E-06 |
| rs6809602  | 3  | 62040414  | <i>PTPRG</i>     | 0.0633 | A | -0.0508 (0.0109) | 2.89E-06 |
| rs16939325 | 8  | 77698209  | <i>ZFHX4</i>     | 0.0452 | A | -0.031 (0.0066)  | 3.00E-06 |
| rs2408863  | 5  | 126584063 | <i>MEGF10</i>    | 0.2631 | C | -0.0171 (0.0037) | 3.01E-06 |
| rs1426093  | 5  | 94465616  | <i>MCTP1</i>     | 0.0388 | G | -0.0567 (0.0122) | 3.08E-06 |
| rs6055681  | 20 | 8159777   | <i>PLCBI</i>     | 0.0363 | G | -0.0408 (0.0087) | 3.09E-06 |
| rs9548937  | 13 | 31218052  | <i>RXFP2</i>     | 0.1787 | G | 0.0239 (0.0051)  | 3.12E-06 |
| rs10257595 | 7  | 33592854  | <i>BBS9</i>      | 0.0404 | G | -0.0339 (0.0073) | 3.17E-06 |
| rs1936598  | 10 | 92389550  | <i>HTR7</i>      | 0.0699 | C | -0.0479 (0.0103) | 3.22E-06 |
| rs4685009  | 3  | 13763884  | <i>WNT7A</i>     | 0.0466 | C | -0.0305 (0.0065) | 3.29E-06 |
| rs3967024  | 3  | 6297086   | <i>GRM7</i>      | 0.403  | G | 0.0175 (0.0038)  | 3.32E-06 |
| rs10223962 | 7  | 33591451  | <i>BBS9</i>      | 0.0404 | T | -0.0339 (0.0073) | 3.33E-06 |
| rs1422313  | 5  | 126657915 | <i>MEGF10</i>    | 0.2993 | T | -0.0165 (0.0036) | 3.35E-06 |
| rs925481   | 15 | 68524205  | <i>UACA</i>      | 0.031  | C | -0.0339 (0.0073) | 3.51E-06 |
| rs7962775  | 12 | 56587367  | <i>XRCC6BPI</i>  | 0.049  | G | -0.0322 (0.0069) | 3.52E-06 |
| rs4685010  | 3  | 13769978  | <i>WNT7A</i>     | 0.0468 | T | -0.0303 (0.0065) | 3.63E-06 |
| rs2588430  | 13 | 92546181  | <i>GPC6</i>      | 0.4795 | G | -0.0192 (0.0041) | 3.64E-06 |
| rs8119460  | 20 | 8118422   | <i>PLCBI</i>     | 0.0383 | G | -0.0392 (0.0085) | 3.69E-06 |

|            |    |           |                 |        |   |                  |          |
|------------|----|-----------|-----------------|--------|---|------------------|----------|
| rs204021   | 16 | 13148611  | <i>ERCC4</i>    | 0.0335 | C | -0.0328 (0.0071) | 3.74E-06 |
| rs4685008  | 3  | 13761995  | <i>WNT7A</i>    | 0.0468 | G | -0.0303 (0.0065) | 3.75E-06 |
| rs4446479  | 5  | 29660526  | <i>PGBD3P2</i>  | 0.0334 | G | -0.0311 (0.0067) | 3.86E-06 |
| rs2059083  | 5  | 126658847 | <i>MEGF10</i>   | 0.2997 | A | -0.0168 (0.0036) | 3.89E-06 |
| rs12201737 | 6  | 25515461  | <i>LRRC16A</i>  | 0.0425 | T | -0.0424 (0.0092) | 3.95E-06 |
| rs7634702  | 3  | 116811864 | <i>GAP43</i>    | 0.0494 | G | -0.0468 (0.0102) | 3.97E-06 |
| rs16847683 | 3  | 139150762 | <i>CLDN18</i>   | 0.0311 | T | -0.0351 (0.0076) | 3.98E-06 |
| rs17719189 | 21 | 19217173  | <i>TMPRSS15</i> | 0.0383 | T | -0.0301 (0.0065) | 4.03E-06 |
| rs6055686  | 20 | 8162567   | <i>PLCB1</i>    | 0.0353 | T | -0.0409 (0.0089) | 4.25E-06 |
| rs11685343 | 2  | 124241203 | <i>CNTNAP5</i>  | 0.0333 | A | -0.0518 (0.0113) | 4.40E-06 |
| rs1920948  | 12 | 114181816 | <i>TBC3</i>     | 0.0458 | A | 0.0377 (0.0082)  | 4.43E-06 |
| rs453270   | 1  | 40628278  | <i>SMAP2</i>    | 0.044  | A | -0.0449 (0.0098) | 4.44E-06 |
| rs2055367  | 12 | 30482536  | <i>IPO8</i>     | 0.0441 | G | -0.0625 (0.0136) | 4.44E-06 |
| rs567422   | 15 | 52450306  | <i>UNC13C</i>   | 0.0656 | T | -0.0385 (0.0084) | 4.47E-06 |
| rs1867510  | 15 | 23581201  | <i>ATP10A</i>   | 0.0372 | T | -0.0504 (0.011)  | 4.57E-06 |
| rs10221630 | 2  | 154439301 | <i>GALNT13</i>  | 0.0751 | C | -0.0258 (0.0056) | 4.59E-06 |
| rs11172377 | 12 | 56582765  | <i>XRCC6BP1</i> | 0.0357 | C | -0.0308 (0.0067) | 4.74E-06 |
| rs13139310 | 4  | 185593905 | <i>IRF2</i>     | 0.0346 | A | -0.0511 (0.0112) | 4.78E-06 |
| rs880225   | 6  | 25510137  | <i>LRRC16A</i>  | 0.0458 | G | -0.0363 (0.0079) | 4.78E-06 |
| rs9490008  | 6  | 120960886 | <i>C6orf170</i> | 0.0366 | T | 0.037 (0.0081)   | 4.93E-06 |
| rs2144460  | 6  | 120965657 | <i>C6orf170</i> | 0.0366 | G | 0.0372 (0.0081)  | 4.94E-06 |
| rs9482059  | 6  | 120967293 | <i>C6orf170</i> | 0.0365 | A | 0.0371 (0.0081)  | 4.94E-06 |

*SNP* single nucleotide polymorphism, *Chr* chromosome, *MAF* minor allele frequency

**Supplemental Table 3** Comprehensive results for 16:0 with  $P < 5 \times 10^{-6}$ 

| SNP        | Chr | Position  | Nearest gene    | MAF    | Minor allele | Beta (SE)        | P        |
|------------|-----|-----------|-----------------|--------|--------------|------------------|----------|
| rs7207332  | 17  | 13146403  | <i>HS3ST3A1</i> | 0.0932 | G            | -0.5439 (0.1051) | 2.25E-07 |
| rs7001076  | 8   | 103129157 | <i>NCALD</i>    | 0.2216 | T            | -0.3108 (0.0623) | 6.16E-07 |
| rs1443769  | 4   | 83168213  | <i>NPM1P41</i>  | 0.0524 | T            | -0.5110 (0.1038) | 8.50E-07 |
| rs7000754  | 8   | 103129024 | <i>NCALD</i>    | 0.2238 | G            | -0.3030 (0.0617) | 8.97E-07 |
| rs7002154  | 8   | 103129612 | <i>NCALD</i>    | 0.2238 | C            | -0.3031 (0.0617) | 9.04E-07 |
| rs7001757  | 8   | 103129641 | <i>NCALD</i>    | 0.2238 | G            | -0.3031 (0.0617) | 9.04E-07 |
| rs7001888  | 8   | 103129604 | <i>NCALD</i>    | 0.2238 | T            | -0.3031 (0.0617) | 9.04E-07 |
| rs1573312  | 8   | 103133038 | <i>NCALD</i>    | 0.2277 | G            | -0.2977 (0.0616) | 1.32E-06 |
| rs2186681  | 8   | 103133197 | <i>NCALD</i>    | 0.2263 | G            | -0.2946 (0.0610) | 1.36E-06 |
| rs921368   | 3   | 55166626  | <i>LRTM1</i>    | 0.1103 | A            | -0.3617 (0.0752) | 1.50E-06 |
| rs10008568 | 4   | 90073215  | <i>FAM13A1</i>  | 0.4992 | G            | 0.2449 (0.0510)  | 1.56E-06 |
| rs4693978  | 4   | 90073190  | <i>FAM13A1</i>  | 0.4992 | A            | 0.2447 (0.0510)  | 1.60E-06 |
| rs13149750 | 4   | 90074017  | <i>FAM13A1</i>  | 0.4992 | G            | 0.2448 (0.0510)  | 1.61E-06 |
| rs7816849  | 8   | 103126338 | <i>NCALD</i>    | 0.2186 | C            | -0.3001 (0.0628) | 1.74E-06 |
| rs4955935  | 3   | 55163554  | <i>LRTM1</i>    | 0.1157 | C            | -0.3480 (0.0730) | 1.85E-06 |
| rs1458562  | 4   | 90072621  | <i>FAM13A1</i>  | 0.4994 | T            | -0.2416 (0.0509) | 2.11E-06 |
| rs1111908  | 8   | 103124395 | <i>NCALD</i>    | 0.218  | G            | -0.2956 (0.0624) | 2.20E-06 |
| rs1111910  | 8   | 103123643 | <i>NCALD</i>    | 0.2178 | C            | -0.2944 (0.0624) | 2.40E-06 |
| rs1893533  | 8   | 103123820 | <i>NCALD</i>    | 0.2177 | G            | -0.2945 (0.0624) | 2.40E-06 |
| rs6984801  | 8   | 103122991 | <i>NCALD</i>    | 0.2195 | C            | -0.2924 (0.0620) | 2.44E-06 |
| rs2869967  | 4   | 90088355  | <i>FAM13A1</i>  | 0.4978 | T            | 0.2415 (0.0514)  | 2.62E-06 |
| rs580845   | 9   | 14093618  | <i>NFIB</i>     | 0.4418 | A            | -0.2518 (0.0536) | 2.69E-06 |
| rs2869966  | 4   | 90088101  | <i>FAM13A1</i>  | 0.498  | C            | 0.2412 (0.0514)  | 2.70E-06 |
| rs7624248  | 3   | 55165483  | <i>LRTM1</i>    | 0.113  | G            | -0.3478 (0.0743) | 2.88E-06 |
| rs7831664  | 8   | 103122467 | <i>NCALD</i>    | 0.2198 | G            | -0.2879 (0.0618) | 3.23E-06 |
| rs2609279  | 4   | 90074518  | <i>FAM13A1</i>  | 0.4538 | T            | 0.2392 (0.0515)  | 3.37E-06 |
| rs2609280  | 4   | 90073984  | <i>FAM13A1</i>  | 0.454  | A            | 0.2389 (0.0514)  | 3.42E-06 |
| rs7463166  | 8   | 4821198   | <i>CSMD1</i>    | 0.0347 | G            | -0.5130 (0.1106) | 3.51E-06 |
| rs2609258  | 4   | 90058617  | <i>FAM13A1</i>  | 0.4549 | C            | 0.2369 (0.0515)  | 4.28E-06 |
| rs4693974  | 4   | 90029418  | <i>FAM13A1</i>  | 0.4961 | G            | -0.2360 (0.0513) | 4.30E-06 |
| rs2609259  | 4   | 90056831  | <i>FAM13A1</i>  | 0.455  | A            | 0.2364 (0.0515)  | 4.48E-06 |
| rs2609262  | 4   | 90054461  | <i>FAM13A1</i>  | 0.4552 | A            | 0.2359 (0.0515)  | 4.68E-06 |
| rs1246642  | 4   | 90083469  | <i>FAM13A1</i>  | 0.4531 | C            | 0.2364 (0.0517)  | 4.84E-06 |

SNP single nucleotide polymorphism, Chr chromosome, MAF minor allele frequency



**Supplemental Table 4** Comprehensive results for 18:0 with  $P < 5 \times 10^{-6}$ 

| SNP        | Chr | Position  | Nearest gene    | MAF    | Minor allele | Beta (SE)        | <i>P</i> |
|------------|-----|-----------|-----------------|--------|--------------|------------------|----------|
| rs6491730  | 13  | 102664091 | <i>SLC10A2</i>  | 0.3226 | G            | -0.2430 (0.0464) | 1.68E-07 |
| rs5748371  | 22  | 18016858  | <i>SEPT5</i>    | 0.0307 | A            | -0.4985 (0.1042) | 1.72E-06 |
| rs4871026  | 8   | 128589959 | <i>POU5F1P1</i> | 0.1053 | C            | -0.2819 (0.0598) | 2.43E-06 |
| rs7007540  | 8   | 128592822 | <i>POU5F1P1</i> | 0.1054 | A            | -0.2807 (0.0598) | 2.64E-06 |
| rs9400209  | 6   | 108581358 | <i>OSTM1</i>    | 0.2266 | G            | -0.2160 (0.0461) | 2.82E-06 |
| rs9400210  | 6   | 108581628 | <i>OSTM1</i>    | 0.2268 | C            | -0.2165 (0.0462) | 2.82E-06 |
| rs17587298 | 4   | 40244412  | <i>RBM47</i>    | 0.1812 | T            | -0.2956 (0.0633) | 3.00E-06 |
| rs4871807  | 8   | 128582513 | <i>POU5F1P1</i> | 0.1055 | T            | -0.2791 (0.0598) | 3.10E-06 |
| rs6817468  | 4   | 40244627  | <i>RBM47</i>    | 0.1812 | T            | -0.2949 (0.0633) | 3.12E-06 |
| rs12173906 | 6   | 108576950 | <i>OSTM1</i>    | 0.2272 | A            | -0.2117 (0.0455) | 3.23E-06 |
| rs2269928  | 11  | 61294105  | <i>C11orf9</i>  | 0.2743 | G            | -0.2944 (0.0634) | 3.37E-06 |
| rs6825574  | 4   | 125093669 | <i>RPL21P50</i> | 0.4233 | A            | -0.1853 (0.0401) | 3.88E-06 |
| rs10206072 | 2   | 121089936 | <i>GLI2</i>     | 0.2866 | A            | -0.4244 (0.0920) | 3.95E-06 |

SNP single nucleotide polymorphism, Chr chromosome, MAF minor allele frequency

**Supplemental Table 5** Comprehensive results for 20:0 with  $P < 5 \times 10^{-6}$ 

| SNP        | Chr | Position  | Nearest gene     | MAF    | Minor allele | Beta (SE)        | <i>P</i> |
|------------|-----|-----------|------------------|--------|--------------|------------------|----------|
| rs17159388 | 19  | 8226555   | <i>LASS4</i>     | 0.191  | A            | -0.0109 (0.0017) | 1.76E-10 |
| rs11881630 | 19  | 8225455   | <i>LASS4</i>     | 0.1905 | T            | -0.0108 (0.0017) | 3.17E-10 |
| rs2927714  | 19  | 8230347   | <i>LASS4</i>     | 0.2929 | T            | -0.0075 (0.0013) | 2.62E-08 |
| rs651821   | 11  | 116167789 | <i>APOA5</i>     | 0.2845 | C            | -0.0072 (0.0014) | 8.84E-08 |
| rs662799   | 11  | 116168917 | <i>APOA5</i>     | 0.2848 | G            | -0.0073 (0.0014) | 9.66E-08 |
| rs7350481  | 11  | 116091493 | <i>APOA5</i>     | 0.2483 | T            | -0.0071 (0.0014) | 2.10E-07 |
| rs168622   | 20  | 12914089  | <i>SPTLC3</i>    | 0.4183 | T            | 0.0058 (0.0012)  | 6.48E-07 |
| rs364585   | 20  | 12910718  | <i>SPTLC3</i>    | 0.4195 | A            | 0.0058 (0.0012)  | 6.81E-07 |
| rs680379   | 20  | 12917400  | <i>SPTLC3</i>    | 0.4181 | A            | 0.0058 (0.0012)  | 7.24E-07 |
| rs3843340  | 2   | 65627966  | <i>RPS15API5</i> | 0.1274 | C            | -0.0076 (0.0016) | 2.58E-06 |
| rs4285310  | 6   | 24246081  | <i>NRSN1</i>     | 0.2095 | A            | 0.0069 (0.0015)  | 2.78E-06 |
| rs12090877 | 1   | 158642684 | <i>VANGL2</i>    | 0.0587 | T            | -0.0113 (0.0024) | 2.98E-06 |
| rs4814176  | 20  | 12907398  | <i>SPTLC3</i>    | 0.4326 | T            | 0.0055 (0.0012)  | 3.07E-06 |
| rs7455023  | 6   | 24241681  | <i>NRSN1</i>     | 0.2099 | A            | 0.0069 (0.0015)  | 3.53E-06 |
| rs9309375  | 2   | 65625659  | <i>RPS15API5</i> | 0.1275 | T            | -0.0074 (0.0016) | 3.96E-06 |

*SNP* single nucleotide polymorphism, *Chr* chromosome, *MAF* minor allele frequency

**Supplemental Table 6** Comprehensive results for 22:0 with  $P < 5 \times 10^{-6}$ 

| SNP        | Chr | Position  | Nearest gene   | MAF    | Minor allele | Beta (SE)        | P        |
|------------|-----|-----------|----------------|--------|--------------|------------------|----------|
| rs6822534  | 4   | 93033016  | <i>CCSER1</i>  | 0.1382 | C            | -0.1051 (0.0202) | 1.98E-07 |
| rs17018970 | 4   | 93101529  | <i>CCSER1</i>  | 0.1414 | C            | -0.0984 (0.0200) | 8.64E-07 |
| rs2965214  | 19  | 12890188  | <i>SYCE2</i>   | 0.1608 | G            | -0.0393 (0.0080) | 1.05E-06 |
| rs8113575  | 19  | 12891280  | <i>SYCE2</i>   | 0.1908 | G            | -0.0394 (0.0081) | 1.12E-06 |
| rs741702   | 19  | 12885250  | <i>SYCE2</i>   | 0.1606 | A            | -0.0392 (0.0080) | 1.14E-06 |
| rs10027172 | 4   | 52968563  | <i>USP46</i>   | 0.1988 | A            | 0.0404 (0.0083)  | 1.18E-06 |
| rs10021930 | 4   | 52995435  | <i>USP46</i>   | 0.1978 | G            | 0.0393 (0.0081)  | 1.20E-06 |
| rs4865312  | 4   | 52996561  | <i>USP46</i>   | 0.1982 | C            | 0.039 (0.0081)   | 1.36E-06 |
| rs17706531 | 19  | 12876530  | <i>SYCE2</i>   | 0.1599 | G            | -0.0387 (0.0081) | 1.61E-06 |
| rs6838531  | 4   | 53322363  | <i>USP46</i>   | 0.2359 | C            | 0.0422 (0.0088)  | 1.68E-06 |
| rs1010222  | 19  | 12909608  | <i>CALR</i>    | 0.1662 | A            | -0.0382 (0.0080) | 1.71E-06 |
| rs2411266  | 4   | 53319114  | <i>USP46</i>   | 0.1884 | A            | 0.0399 (0.0084)  | 1.98E-06 |
| rs7660838  | 4   | 53319145  | <i>USP46</i>   | 0.1896 | G            | 0.0396 (0.0083)  | 2.11E-06 |
| rs7697631  | 4   | 53318876  | <i>USP46</i>   | 0.1897 | T            | 0.0395 (0.0083)  | 2.16E-06 |
| rs10009096 | 4   | 53318494  | <i>USP46</i>   | 0.1897 | T            | 0.0395 (0.0083)  | 2.19E-06 |
| rs10015760 | 4   | 53320858  | <i>USP46</i>   | 0.1869 | T            | 0.04 (0.0085)    | 2.36E-06 |
| rs10027138 | 4   | 53097338  | <i>USP46</i>   | 0.1495 | G            | 0.0448 (0.0095)  | 2.57E-06 |
| rs4865408  | 4   | 53314124  | <i>USP46</i>   | 0.1903 | T            | 0.0387 (0.0083)  | 2.79E-06 |
| rs7690219  | 4   | 53310805  | <i>USP46</i>   | 0.1946 | C            | 0.0378 (0.0081)  | 2.85E-06 |
| rs4865407  | 4   | 53313898  | <i>USP46</i>   | 0.1903 | C            | 0.0386 (0.0083)  | 2.88E-06 |
| rs9384     | 19  | 12871643  | <i>SYCE2</i>   | 0.1673 | T            | -0.0378 (0.0081) | 2.96E-06 |
| rs2293683  | 19  | 12900284  | <i>FARSA</i>   | 0.1814 | A            | -0.036 (0.0077)  | 3.07E-06 |
| rs6836873  | 4   | 53293732  | <i>USP46</i>   | 0.1658 | T            | 0.0415 (0.0089)  | 3.10E-06 |
| rs7575204  | 2   | 33499154  | <i>RASGRP3</i> | 0.2503 | C            | -0.034 (0.0073)  | 3.18E-06 |
| rs9992287  | 4   | 53306659  | <i>USP46</i>   | 0.1949 | G            | 0.0373 (0.0080)  | 3.42E-06 |
| rs3733503  | 4   | 53306458  | <i>USP46</i>   | 0.1948 | C            | 0.0373 (0.0080)  | 3.44E-06 |
| rs4286600  | 4   | 53290445  | <i>USP46</i>   | 0.1655 | G            | 0.041 (0.0089)   | 3.78E-06 |
| rs2577942  | 4   | 53092326  | <i>USP46</i>   | 0.1333 | A            | 0.0458 (0.0099)  | 3.85E-06 |
| rs3733504  | 4   | 53306425  | <i>USP46</i>   | 0.1962 | C            | 0.0371 (0.0080)  | 3.86E-06 |
| rs6817996  | 4   | 53293825  | <i>USP46</i>   | 0.1769 | A            | 0.0398 (0.0086)  | 3.91E-06 |
| rs346923   | 4   | 53106886  | <i>USP46</i>   | 0.193  | A            | 0.037 (0.0080)   | 4.00E-06 |
| rs7699030  | 4   | 53289523  | <i>USP46</i>   | 0.1655 | G            | 0.0409 (0.0089)  | 4.03E-06 |
| rs12716759 | 16  | 83935092  | <i>TMEM148</i> | 0.3272 | C            | 0.0313 (0.0068)  | 4.06E-06 |
| rs1525525  | 7   | 148693155 | <i>NPM1P12</i> | 0.253  | T            | -0.0788 (0.0171) | 4.14E-06 |
| rs2577946  | 4   | 53098843  | <i>USP46</i>   | 0.1929 | C            | 0.0369 (0.0080)  | 4.18E-06 |
| rs17675398 | 4   | 52999309  | <i>USP46</i>   | 0.1941 | G            | 0.0369 (0.0080)  | 4.23E-06 |
| rs1347763  | 4   | 53094373  | <i>USP46</i>   | 0.1934 | C            | 0.0367 (0.0080)  | 4.50E-06 |
| rs9312711  | 4   | 53096903  | <i>USP46</i>   | 0.1932 | A            | 0.0366 (0.0080)  | 4.51E-06 |
| rs10084879 | 4   | 53066778  | <i>USP46</i>   | 0.1937 | A            | 0.0368 (0.0080)  | 4.52E-06 |
| rs4941114  | 18  | 57965751  | <i>PIGN</i>    | 0.2846 | G            | 0.0305 (0.0067)  | 4.81E-06 |
| rs11085824 | 19  | 12862547  | <i>GCDH</i>    | 0.1558 | G            | -0.0375 (0.0082) | 4.86E-06 |

---

|           |    |          |             |        |   |                 |          |
|-----------|----|----------|-------------|--------|---|-----------------|----------|
| rs9959469 | 18 | 57967271 | <i>PIGN</i> | 0.2846 | A | 0.0304 (0.0067) | 4.93E-06 |
|-----------|----|----------|-------------|--------|---|-----------------|----------|

---

*SNP* single nucleotide polymorphism, *Chr* chromosome, *MAF* minor allele frequency

**Supplemental Table 7** Comprehensive results for 24:0 with  $P < 5 \times 10^{-6}$ 

| SNP       | Chr | Position | Nearest gene     | MAF    | Minor allele | Beta (SE)       | P        |
|-----------|-----|----------|------------------|--------|--------------|-----------------|----------|
| rs9349666 | 6   | 53327632 | <i>ELOVL5</i>    | 0.3399 | A            | 0.1184 (0.0228) | 3.88E-07 |
| rs4285320 | 6   | 53328079 | <i>ELOVL5</i>    | 0.327  | C            | 0.1142 (0.0229) | 1.06E-06 |
| rs910045  | 6   | 53324168 | <i>ELOVL5</i>    | 0.327  | T            | 0.1142 (0.0229) | 1.07E-06 |
| rs9395854 | 6   | 53280718 | <i>ELOVL5</i>    | 0.3335 | A            | 0.1105 (0.0223) | 1.21E-06 |
| rs6458913 | 6   | 53260601 | <i>ELOVL5</i>    | 0.3338 | A            | 0.1103 (0.0223) | 1.27E-06 |
| rs2115563 | 6   | 53329941 | <i>ELOVL5</i>    | 0.3328 | G            | 0.1131 (0.0229) | 1.32E-06 |
| rs9382198 | 6   | 53315684 | <i>ELOVL5</i>    | 0.3341 | C            | 0.1100 (0.0223) | 1.36E-06 |
| rs2235723 | 6   | 53254362 | <i>ELOVL5</i>    | 0.3335 | G            | 0.1098 (0.0223) | 1.42E-06 |
| rs974323  | 6   | 53267506 | <i>ELOVL5</i>    | 0.3336 | T            | 0.1097 (0.0223) | 1.44E-06 |
| rs9296707 | 6   | 53270577 | <i>ELOVL5</i>    | 0.3336 | C            | 0.1097 (0.0223) | 1.44E-06 |
| rs9367520 | 6   | 53271883 | <i>ELOVL5</i>    | 0.3336 | C            | 0.1097 (0.0223) | 1.44E-06 |
| rs2294869 | 6   | 53263299 | <i>ELOVL5</i>    | 0.3336 | C            | 0.1097 (0.0223) | 1.44E-06 |
| rs6907982 | 6   | 53260717 | <i>ELOVL5</i>    | 0.3336 | G            | 0.1097 (0.0223) | 1.44E-06 |
| rs6915255 | 6   | 53270106 | <i>ELOVL5</i>    | 0.3336 | C            | 0.1097 (0.0223) | 1.44E-06 |
| rs9349660 | 6   | 53262169 | <i>ELOVL5</i>    | 0.3336 | T            | 0.1097 (0.0223) | 1.44E-06 |
| rs9370190 | 6   | 53269484 | <i>ELOVL5</i>    | 0.3336 | G            | 0.1097 (0.0223) | 1.44E-06 |
| rs9296708 | 6   | 53272858 | <i>ELOVL5</i>    | 0.3336 | C            | 0.1097 (0.0223) | 1.44E-06 |
| rs761179  | 6   | 53274795 | <i>ELOVL5</i>    | 0.3336 | C            | 0.1097 (0.0223) | 1.44E-06 |
| rs1864250 | 6   | 53314110 | <i>ELOVL5</i>    | 0.3335 | G            | 0.1097 (0.0223) | 1.44E-06 |
| rs9370193 | 6   | 53282296 | <i>ELOVL5</i>    | 0.3336 | C            | 0.1097 (0.0223) | 1.44E-06 |
| rs9370194 | 6   | 53283641 | <i>ELOVL5</i>    | 0.3336 | T            | 0.1097 (0.0223) | 1.44E-06 |
| rs4431421 | 6   | 53282765 | <i>ELOVL5</i>    | 0.3336 | C            | 0.1097 (0.0223) | 1.44E-06 |
| rs9382193 | 6   | 53284326 | <i>ELOVL5</i>    | 0.3336 | C            | 0.1097 (0.0223) | 1.44E-06 |
| rs9370201 | 6   | 53318131 | <i>ELOVL5</i>    | 0.3335 | G            | 0.1097 (0.0223) | 1.44E-06 |
| rs9367523 | 6   | 53315409 | <i>ELOVL5</i>    | 0.3335 | G            | 0.1097 (0.0223) | 1.44E-06 |
| rs1864249 | 6   | 53314167 | <i>ELOVL5</i>    | 0.3335 | T            | 0.1097 (0.0223) | 1.44E-06 |
| rs2397142 | 6   | 53308258 | <i>ELOVL5</i>    | 0.3335 | G            | 0.1097 (0.0223) | 1.44E-06 |
| rs4562128 | 6   | 53310565 | <i>LOC647190</i> | 0.3335 | C            | 0.1097 (0.0223) | 1.44E-06 |
| rs9370200 | 6   | 53311941 | <i>ELOVL5</i>    | 0.3335 | T            | 0.1097 (0.0223) | 1.44E-06 |
| rs926586  | 6   | 53305896 | <i>ELOVL5</i>    | 0.3335 | G            | 0.1097 (0.0223) | 1.44E-06 |
| rs9382199 | 6   | 53317079 | <i>ELOVL5</i>    | 0.3335 | C            | 0.1097 (0.0223) | 1.44E-06 |
| rs2894809 | 6   | 53305744 | <i>ELOVL5</i>    | 0.3335 | C            | 0.1097 (0.0223) | 1.44E-06 |
| rs9370198 | 6   | 53303778 | <i>ELOVL5</i>    | 0.3337 | C            | 0.1098 (0.0223) | 1.45E-06 |
| rs6458918 | 6   | 53300965 | <i>ELOVL5</i>    | 0.3337 | C            | 0.1098 (0.0223) | 1.45E-06 |
| rs9370197 | 6   | 53303516 | <i>ELOVL5</i>    | 0.3337 | C            | 0.1098 (0.0223) | 1.45E-06 |
| rs9382197 | 6   | 53302085 | <i>ELOVL5</i>    | 0.3337 | G            | 0.1098 (0.0223) | 1.45E-06 |
| rs2294863 | 6   | 53248719 | <i>ELOVL5</i>    | 0.3332 | A            | 0.1096 (0.0223) | 1.45E-06 |
| rs9463895 | 6   | 53246219 | <i>ELOVL5</i>    | 0.3332 | A            | 0.1095 (0.0223) | 1.49E-06 |
| rs7738788 | 6   | 53294567 | <i>ELOVL5</i>    | 0.3338 | C            | 0.1096 (0.0223) | 1.52E-06 |
| rs7747926 | 6   | 53292467 | <i>ELOVL5</i>    | 0.3338 | C            | 0.1096 (0.0223) | 1.52E-06 |
| rs9367521 | 6   | 53288126 | <i>ELOVL5</i>    | 0.3338 | C            | 0.1096 (0.0223) | 1.52E-06 |

|            |    |          |               |        |   |                  |          |
|------------|----|----------|---------------|--------|---|------------------|----------|
| rs9382194  | 6  | 53287738 | <i>ELOVL5</i> | 0.3338 | A | 0.1096 (0.0223)  | 1.52E-06 |
| rs9395857  | 6  | 53285441 | <i>ELOVL5</i> | 0.3338 | C | 0.1096 (0.0223)  | 1.52E-06 |
| rs9474484  | 6  | 53290724 | <i>ELOVL5</i> | 0.3338 | C | 0.1096 (0.0223)  | 1.52E-06 |
| rs9357760  | 6  | 53298093 | <i>ELOVL5</i> | 0.3338 | G | 0.1096 (0.0223)  | 1.52E-06 |
| rs9370196  | 6  | 53298209 | <i>ELOVL5</i> | 0.3338 | C | 0.1096 (0.0223)  | 1.52E-06 |
| rs9395856  | 6  | 53284867 | <i>ELOVL5</i> | 0.3338 | T | 0.1096 (0.0223)  | 1.52E-06 |
| rs2057024  | 6  | 53238040 | <i>ELOVL5</i> | 0.3338 | T | 0.1092 (0.0223)  | 1.61E-06 |
| rs2057023  | 6  | 53237701 | <i>ELOVL5</i> | 0.3332 | A | 0.1092 (0.0223)  | 1.61E-06 |
| rs2562896  | 6  | 53233861 | <i>ELOVL5</i> | 0.3358 | C | 0.1097 (0.0224)  | 1.70E-06 |
| rs9474476  | 6  | 53257463 | <i>ELOVL5</i> | 0.329  | C | 0.1078 (0.0225)  | 2.74E-06 |
| rs2817108  | 6  | 53217260 | <i>ELOVL5</i> | 0.4222 | C | 0.1045 (0.0219)  | 3.16E-06 |
| rs2562898  | 6  | 53221300 | <i>ELOVL5</i> | 0.4222 | T | 0.1040 (0.0218)  | 3.25E-06 |
| rs4697186  | 4  | 20430556 | <i>KCNIP4</i> | 0.4696 | G | 0.1168 (0.0246)  | 3.48E-06 |
| rs6458912  | 6  | 53255924 | <i>ELOVL5</i> | 0.3721 | A | 0.1032 (0.0219)  | 4.22E-06 |
| rs17085918 | 13 | 27151219 | <i>POLRID</i> | 0.2358 | G | -0.1164 (0.0248) | 4.60E-06 |

*SNP* single nucleotide polymorphism, *Chr* chromosome, *MAF* minor allele frequency

**Supplemental Table 8** SNPs reaching genome-wide significance in cohort-specific GWAS

| Fatty acid                | Nearest Gene        | SNP            | CHR        | Position  | Coded allele/<br>non-coded allele | CAF   | NHAPC        |               |              | MESA          |               |               | Combined      |              | I <sup>2</sup> | P <sub>heter</sub> |
|---------------------------|---------------------|----------------|------------|-----------|-----------------------------------|-------|--------------|---------------|--------------|---------------|---------------|---------------|---------------|--------------|----------------|--------------------|
|                           |                     |                |            |           |                                   |       | CAF          | beta (SE)     | P            | CAF           | beta (SE)     | P             | beta (SE)     | P            |                |                    |
| Significant SNPs in NHAPC |                     |                |            |           |                                   |       |              |               |              |               |               |               |               |              |                |                    |
| 14:0                      | <i>FECHP</i>        | rs1440385      | 3          | 34120601  | A/G                               | 0.080 | 0.077        | -0.049(0.009) | 4.24E-08     | 0.083         | 0.013(0.008)  | 0.091         | -0.013(0.006) | 0.026        | 0.96           | 2.41E-07           |
|                           |                     | <i>FAM110B</i> | rs10448026 | 8         | 59105293                          | T/G   | 0.926        | 0.923         | 0.054(0.010) | 1.77E-08      | 0.928         | -0.006(0.008) | 0.429         | 0.017(0.006) | 5.09E-03       | 0.96               |
|                           | rs1122328           |                |            | 59100304  | T/C                               | 0.074 | 0.078        | -0.053(0.009) | 2.46E-08     | 0.072         | 0.006(0.008)  | 0.430         | -0.017(0.006) | 5.61E-03     | 0.96           | 1.83E-06           |
|                           | rs4480114           |                |            | 59094841  | A/C                               | 0.074 | 0.077        | -0.054(0.010) | 1.76E-08     | 0.072         | 0.006(0.008)  | 0.429         | -0.017(0.006) | 5.13E-03     | 0.96           | 1.44E-06           |
|                           | rs9792275           |                | 59089520   | T/C       | 0.931                             | 0.926 | 0.055(0.010) | 2.56E-08      | 0.934        | -0.006(0.008) | 0.440         | 0.018(0.006)  | 5.21E-03      | 0.96         | 2.07E-06       |                    |
|                           | <i>AICF</i>         | rs10821905     | 10         | 52316099  | A/G                               | 0.055 | 0.057        | -0.055(0.010) | 1.19E-08     | 0.054         | 0.006(0.009)  | 0.489         | -0.021(0.007) | 1.44E-03     | 0.95           | 3.55E-06           |
|                           |                     | rs10994856     |            | 52315254  | A/G                               | 0.055 | 0.057        | -0.055(0.010) | 1.14E-08     | 0.053         | 0.006(0.009)  | 0.485         | -0.021(0.007) | 1.34E-03     | 0.95           | 3.67E-06           |
|                           |                     | rs10994860     |            | 52315430  | T/C                               | 0.055 | 0.057        | -0.055(0.010) | 1.15E-08     | 0.053         | 0.006(0.009)  | 0.485         | -0.021(0.007) | 1.34E-03     | 0.95           | 3.68E-06           |
|                           | <i>JAM3</i>         | rs11601844     | 11         | 133437995 | C/G                               | 0.892 | 0.902        | 0.056(0.010)  | 1.01E-08     | 0.888         | 0.008(0.006)  | 0.157         | 0.021(0.005)  | 4.21E-05     | 0.94           | 4.46E-05           |
|                           | <i>RASSF8</i>       | rs1513126      | 12         | 26096646  | A/G                               | 0.944 | 0.948        | 0.055(0.010)  | 7.14E-09     | 0.942         | 0.009(0.007)  | 0.202         | 0.024(0.006)  | 1.75E-05     | 0.94           | 9.28E-05           |
| <i>MACROD2</i>            | rs8120608           | 20             | 15202051   | T/G       | 0.913                             | 0.919 | 0.051(0.009) | 1.19E-08      | 0.908        | -0.009(0.008) | 0.257         | 0.017(0.006)  | 4.73E-03      | 0.96         | 7.57E-07       |                    |
| 20:0                      | <i>CERS4</i>        | rs17159388     | 19         | 8226555   | A/G                               | 0.191 | 0.191        | -0.011(0.002) | 1.76E-10     | NA            | NA            | NA            | -0.011(0.002) | 1.76E-10     | NA             | NA                 |
|                           |                     | rs11881630     |            | 8225455   | C/T                               | 0.810 | 0.810        | 0.011(0.002)  | 3.17E-10     | NA            | NA            | NA            | 0.011(0.002)  | 3.17E-10     | NA             | NA                 |
|                           |                     | rs2927714      |            | 8230347   | T/C                               | 0.293 | 0.293        | -0.008(0.001) | 2.62E-08     | NA            | NA            | NA            | -0.008(0.001) | 2.62E-08     | NA             | NA                 |
| Significant SNPs in MESA  |                     |                |            |           |                                   |       |              |               |              |               |               |               |               |              |                |                    |
| 14:0                      | <i>LOC100128956</i> | rs10065046     | 5          | 126596938 | T/C                               | 0.260 | 0.270        | -0.005(0.009) | 0.539        | 0.259         | -0.020(0.004) | 4.91E-08      | -0.018(0.004) | 1.77E-07     | 0.58           | 0.125              |
|                           |                     | rs6595752      |            | 126593983 | A/T                               | 0.738 | 0.728        | 0.006(0.009)  | 0.522        | 0.739         | 0.021(0.004)  | 4.68E-08      | 0.019(0.004)  | 1.58E-07     | 0.56           | 0.133              |
|                           |                     | rs6871230      |            | 126595483 | T/C                               | 0.270 | 0.273        | -0.005(0.009) | 0.572        | 0.265         | -0.021(0.004) | 3.44E-08      | -0.019(0.004) | 1.46E-07     | 0.62           | 0.107              |
| 22:0                      | <i>ST8SIA5</i>      | rs328120       | 18         | 42525097  | C/G                               | 0.062 | 0.064        | -0.006(0.013) | 0.653        | 0.052         | -0.151(0.028) | 4.31E-08      | -0.031(0.012) | 7.60 E-03    | 0.96           | 2.33E-06           |
|                           |                     | rs328134       |            | 42510512  | T/C                               | 0.066 | 0.068        | -0.005(0.012) | 0.707        | 0.060         | -0.142(0.025) | 9.45E-09      | -0.031(0.011) | 4.64E-03     | 0.96           | 8.57E-07           |
|                           |                     | rs430361       |            | 42501316  | A/G                               | 0.067 | 0.068        | -0.005(0.012) | 0.700        | 0.061         | -0.137(0.025) | 3.80E-08      | -0.030(0.011) | 6.41E-03     | 0.96           | 2.47E-06           |
|                           |                     | rs447137       |            | 42503613  | T/C                               | 0.066 | 0.068        | -0.005(0.012) | 0.686        | 0.059         | -0.140(0.025) | 1.27E-08      | -0.032(0.011) | 4.35E-03     | 0.96           | 1.20E-06           |
|                           |                     | rs645631       |            | 42505993  | A/C                               | 0.934 | 0.932        | 0.005(0.012)  | 0.685        | 0.944         | 0.145(0.026)  | 2.27E-08      | 0.030(0.011)  | 6.69E-03     | 0.96           | 1.42E-06           |

SNP single nucleotide polymorphism, CHR chromosome, CAF coded allele frequency, NA not available, I<sup>2</sup> I square of heterogeneity, P<sub>heter</sub> heterogeneity of effect sizes between NHAPC and MESA studies

**Supplemental Table 9** Replication of 16:0 related top SNPs with  $P < 5 \times 10^{-6}$  identified in European ancestry populations <sup>a</sup>

| SNP        | Closest Gene  | Effect allele | European ancestry populations |                     |                 |          | Chinese populations |                     |                 |         |
|------------|---------------|---------------|-------------------------------|---------------------|-----------------|----------|---------------------|---------------------|-----------------|---------|
|            |               |               | EAF                           | Effect <sup>b</sup> | SE <sup>b</sup> | $P^b$    | EAF                 | Effect <sup>b</sup> | SE <sup>b</sup> | $P^b$   |
| rs2391388  | <i>ALG14</i>  | a             | 0.5494                        | -0.1775             | 0.0266          | 2.72E-11 | 0.1798              | -0.1308             | 0.0691          | 0.05814 |
| rs6675668  | <i>ALG14</i>  | t             | 0.4796                        | 0.1785              | 0.0274          | 7.50E-11 | 0.8162              | 0.1447              | 0.0686          | 0.03502 |
| rs7537374  | <i>ALG14</i>  | a             | 0.5082                        | -0.1733             | 0.0268          | 1.05E-10 | 0.18                | -0.1341             | 0.0691          | 0.05219 |
| rs7547662  | <i>ALG14</i>  | t             | 0.4857                        | 0.1724              | 0.0267          | 1.07E-10 | 0.8346              | 0.0937              | 0.0751          | 0.2121  |
| rs7533303  | <i>ALG14</i>  | t             | 0.5095                        | -0.1709             | 0.0267          | 1.45E-10 | 0.1765              | -0.1083             | 0.0718          | 0.1318  |
| rs11585462 | <i>ALG14</i>  | a             | 0.4428                        | -0.1764             | 0.0276          | 1.58E-10 | 0.1834              | -0.1395             | 0.0684          | 0.04143 |
| rs6687388  | <i>ALG14</i>  | t             | 0.4459                        | -0.1735             | 0.0271          | 1.60E-10 | 0.1831              | -0.1421             | 0.0688          | 0.03883 |
| rs4339907  | <i>ALG14</i>  | a             | 0.4477                        | -0.177              | 0.0277          | 1.64E-10 | 0.1831              | -0.1426             | 0.0688          | 0.03832 |
| rs2797623  | <i>ALG14</i>  | a             | 0.4851                        | 0.171               | 0.0268          | 1.66E-10 | 0.8464              | 0.0416              | 0.077           | 0.5894  |
| rs10874902 | <i>ALG14</i>  | a             | 0.5617                        | 0.1781              | 0.0279          | 1.83E-10 | 0.8173              | 0.1402              | 0.0689          | 0.04184 |
| rs10735790 | <i>ALG14</i>  | t             | 0.4479                        | -0.1719             | 0.0271          | 2.25E-10 | 0.1757              | -0.1491             | 0.0707          | 0.03499 |
| rs4847220  | <i>ALG14</i>  | a             | 0.4352                        | -0.1675             | 0.0265          | 2.57E-10 | 0.1741              | -0.1218             | 0.0717          | 0.0892  |
| rs6671200  | <i>RWDD3</i>  | a             | 0.088                         | 0.2906              | 0.046           | 2.70E-10 | NA                  | NA                  | NA              | NA      |
| rs6678964  | <i>RWDD3</i>  | a             | 0.0885                        | 0.2911              | 0.0462          | 2.89E-10 | NA                  | NA                  | NA              | NA      |
| rs259350   | <i>RWDD3</i>  | c             | 0.9081                        | -0.2917             | 0.0463          | 3.07E-10 | NA                  | NA                  | NA              | NA      |
| rs259357   | <i>RWDD3</i>  | t             | 0.912                         | -0.2903             | 0.0461          | 3.16E-10 | NA                  | NA                  | NA              | NA      |
| rs4630159  | <i>ALG14</i>  | t             | 0.4342                        | -0.171              | 0.0272          | 3.26E-10 | 0.1836              | -0.1346             | 0.0678          | 0.04712 |
| rs12749053 | <i>TMEM56</i> | a             | 0.9087                        | -0.2871             | 0.0459          | 3.82E-10 | NA                  | NA                  | NA              | NA      |
| rs6687450  | <i>ALG14</i>  | t             | 0.4317                        | -0.1679             | 0.0268          | 3.84E-10 | 0.1668              | -0.1277             | 0.0758          | 0.09203 |
| rs9437812  | <i>ALG14</i>  | a             | 0.569                         | 0.1693              | 0.0271          | 3.93E-10 | 0.8168              | 0.1337              | 0.0681          | 0.04947 |
| rs6698046  | <i>ALG14</i>  | a             | 0.435                         | -0.1648             | 0.0264          | 4.04E-10 | 0.1539              | -0.0579             | 0.0741          | 0.4342  |
| rs4950058  | <i>ALG14</i>  | t             | 0.5701                        | 0.1688              | 0.027           | 4.15E-10 | 0.8168              | 0.1337              | 0.0681          | 0.0495  |
| rs4949965  | <i>ALG14</i>  | a             | 0.5688                        | 0.1642              | 0.0265          | 5.53E-10 | 0.8169              | 0.1336              | 0.0681          | 0.04965 |
| rs12741128 | <i>TMEM56</i> | t             | 0.424                         | -0.1641             | 0.0265          | 5.73E-10 | 0.1795              | -0.1174             | 0.0698          | 0.09245 |
| rs11591183 | <i>TMEM56</i> | t             | 0.5704                        | 0.1631              | 0.0264          | 6.41E-10 | 0.8179              | 0.1304              | 0.0684          | 0.05678 |
| rs933107   | <i>TMEM56</i> | t             | 0.9086                        | -0.2841             | 0.046           | 6.53E-10 | NA                  | NA                  | NA              | NA      |
| rs12569207 | <i>ALG14</i>  | a             | 0.43                          | -0.1629             | 0.0264          | 6.54E-10 | 0.1827              | -0.1316             | 0.0683          | 0.0538  |
| rs11165339 | <i>TMEM56</i> | t             | 0.091                         | 0.284               | 0.0461          | 7.06E-10 | NA                  | NA                  | NA              | NA      |
| rs4390223  | <i>ALG14</i>  | t             | 0.5701                        | 0.1617              | 0.0263          | 8.32E-10 | 0.8173              | 0.1313              | 0.0683          | 0.05445 |
| rs2766010  | <i>ALG14</i>  | t             | 0.5651                        | 0.1599              | 0.0262          | 1.05E-09 | 0.848               | 0.0411              | 0.0769          | 0.5937  |
| rs12755552 | <i>RWDD3</i>  | a             | 0.909                         | -0.2824             | 0.0463          | 1.10E-09 | NA                  | NA                  | NA              | NA      |
| rs2797622  | <i>ALG14</i>  | a             | 0.5648                        | 0.1601              | 0.0263          | 1.15E-09 | 0.8471              | 0.0372              | 0.0772          | 0.6303  |
| rs859046   | <i>CNN3</i>   | t             | 0.3258                        | -0.1754             | 0.0288          | 1.16E-09 | 0.1946              | 0.0206              | 0.0668          | 0.7577  |
| rs259346   | <i>RWDD3</i>  | a             | 0.0884                        | 0.291               | 0.0478          | 1.17E-09 | NA                  | NA                  | NA              | NA      |
| rs859044   | <i>CNN3</i>   | a             | 0.3224                        | -0.1799             | 0.0296          | 1.19E-09 | 0.2084              | 0.0253              | 0.0851          | 0.7661  |
| rs10747468 | <i>RWDD3</i>  | t             | 0.091                         | 0.281               | 0.0463          | 1.26E-09 | NA                  | NA                  | NA              | NA      |
| rs2391391  | <i>ALG14</i>  | a             | 0.2742                        | 0.1798              | 0.0296          | 1.31E-09 | 0.2373              | 0.0742              | 0.0598          | 0.214   |
| rs13375406 | <i>TMEM56</i> | c             | 0.0906                        | 0.2911              | 0.0481          | 1.39E-09 | NA                  | NA                  | NA              | NA      |
| rs7540821  | <i>ALG14</i>  | a             | 0.8017                        | -0.2002             | 0.0334          | 2.06E-09 | 0.8553              | -0.0183             | 0.0687          | 0.7897  |
| rs11165297 | <i>ALG14</i>  | a             | 0.1912                        | 0.2068              | 0.0346          | 2.22E-09 | 0.1408              | 0.0369              | 0.0704          | 0.6006  |
| rs6674604  | <i>ALG14</i>  | a             | 0.1932                        | 0.2002              | 0.0336          | 2.44E-09 | 0.1404              | 0.0301              | 0.0703          | 0.6682  |
| rs11589700 | <i>ALG14</i>  | t             | 0.1025                        | 0.2604              | 0.0437          | 2.45E-09 | NA                  | NA                  | NA              | NA      |
| rs6697256  | <i>TMEM56</i> | a             | 0.1501                        | 0.2253              | 0.0378          | 2.48E-09 | 0.3886              | -0.0164             | 0.0522          | 0.753   |
| rs6698894  | <i>ALG14</i>  | t             | 0.8077                        | -0.2036             | 0.0342          | 2.52E-09 | NA                  | NA                  | NA              | NA      |
| rs12751633 | <i>ALG14</i>  | t             | 0.8003                        | -0.1992             | 0.0334          | 2.56E-09 | 0.8552              | -0.0184             | 0.0687          | 0.7889  |



|            |               |   |        |         |        |          |        |          |        |         |
|------------|---------------|---|--------|---------|--------|----------|--------|----------|--------|---------|
| rs11586384 | <i>ALG14</i>  | a | 0.1011 | 0.2751  | 0.0463 | 2.89E-09 | NA     | NA       | NA     | NA      |
| rs7528790  | <i>RWDD3</i>  | a | 0.1285 | 0.2341  | 0.0395 | 3.15E-09 | 0.2395 | 0.0243   | 0.0583 | 0.6766  |
| rs3753872  | <i>RWDD3</i>  | t | 0.1289 | 0.2339  | 0.0395 | 3.17E-09 | 0.2491 | 0.0377   | 0.0582 | 0.5165  |
| rs2147587  | <i>RWDD3</i>  | a | 0.8717 | -0.2336 | 0.0395 | 3.22E-09 | 0.7548 | -0.0309  | 0.0588 | 0.599   |
| rs6671842  | <i>ALG14</i>  | t | 0.1957 | 0.1965  | 0.0333 | 3.41E-09 | 0.1901 | 0.1033   | 0.089  | 0.2457  |
| rs860873   | <i>CNN3</i>   | a | 0.4433 | -0.1668 | 0.0283 | 3.58E-09 | 0.1722 | 0.0351   | 0.0719 | 0.6255  |
| rs2296308  | <i>RWDD3</i>  | t | 0.1283 | 0.2328  | 0.0395 | 3.60E-09 | 0.2394 | 0.0241   | 0.0583 | 0.6789  |
| rs12760863 | <i>ALG14</i>  | a | 0.1993 | 0.2032  | 0.0346 | 4.30E-09 | 0.1405 | 0.0318   | 0.0709 | 0.6538  |
| rs12751061 | <i>ALG14</i>  | a | 0.9002 | -0.2823 | 0.0483 | 4.93E-09 | NA     | NA       | NA     | NA      |
| rs9437689  | <i>ALG14</i>  | t | 0.4592 | -0.1615 | 0.0276 | 5.07E-09 | 0.1852 | -0.139   | 0.0681 | 0.04141 |
| rs1265169  | <i>CNN3</i>   | c | 0.4387 | -0.1557 | 0.0268 | 5.86E-09 | 0.118  | -0.0346  | 0.0859 | 0.6873  |
| rs12092678 | <i>ALG14</i>  | t | 0.8337 | -0.2094 | 0.036  | 6.07E-09 | 0.9195 | -0.0888  | 0.0964 | 0.3568  |
| rs6674467  | <i>ALG14</i>  | a | 0.1425 | 0.2292  | 0.0396 | 6.93E-09 | 0.0975 | 0.0093   | 0.0795 | 0.9068  |
| rs6672045  | <i>ALG14</i>  | t | 0.8436 | -0.2147 | 0.0371 | 7.09E-09 | NA     | NA       | NA     | NA      |
| rs6684137  | <i>ALG14</i>  | a | 0.1443 | 0.2268  | 0.0392 | 7.25E-09 | 0.0967 | 0.0173   | 0.0809 | 0.8302  |
| rs11801110 | <i>ALG14</i>  | t | 0.1453 | 0.2225  | 0.0385 | 7.52E-09 | 0.0967 | 0.0157   | 0.0806 | 0.8457  |
| rs1146461  | <i>CNN3</i>   | a | 0.5685 | 0.1534  | 0.0266 | 7.67E-09 | 0.8819 | 0.0361   | 0.0854 | 0.6727  |
| rs859040   | <i>CNN3</i>   | t | 0.1519 | 0.2117  | 0.0367 | 8.00E-09 | 0.5237 | -0.1074  | 0.0526 | 0.0412  |
| rs11165281 | <i>ALG14</i>  | t | 0.1586 | 0.2111  | 0.0366 | 8.07E-09 | 0.1818 | 0.0683   | 0.0678 | 0.3135  |
| rs12739445 | <i>ALG14</i>  | c | 0.0972 | 0.2858  | 0.0497 | 8.57E-09 | NA     | NA       | NA     | NA      |
| rs4387224  | <i>ALG14</i>  | t | 0.855  | -0.2208 | 0.0384 | 8.78E-09 | 0.9033 | -0.0158  | 0.0806 | 0.8443  |
| rs6678809  | <i>ALG14</i>  | c | 0.8549 | -0.2224 | 0.0387 | 9.18E-09 | 0.9032 | -0.0161  | 0.0807 | 0.8415  |
| rs10493880 | <i>ALG14</i>  | t | 0.4376 | -0.1517 | 0.0264 | 9.23E-09 | 0.2221 | -0.0166  | 0.0634 | 0.7933  |
| rs3890785  | <i>ALG14</i>  | t | 0.8557 | -0.2213 | 0.0386 | 9.70E-09 | 0.9033 | -0.0158  | 0.0806 | 0.8448  |
| rs6680551  | <i>TMEM56</i> | a | 0.15   | 0.2104  | 0.0367 | 9.96E-09 | 0.3882 | -0.0178  | 0.0521 | 0.7331  |
| rs10465759 | <i>ALG14</i>  | t | 0.854  | -0.2152 | 0.0375 | 1.00E-08 | 0.9028 | -0.0045  | 0.0794 | 0.9549  |
| rs2298162  | <i>ALG14</i>  | t | 0.631  | -0.155  | 0.0271 | 1.11E-08 | 0.2429 | 0.0358   | 0.0624 | 0.5654  |
| rs2766005  | <i>ALG14</i>  | a | 0.4246 | 0.15    | 0.0263 | 1.18E-08 | 0.8631 | 0.0251   | 0.0801 | 0.7536  |
| rs864553   | <i>CNN3</i>   | c | 0.15   | 0.2175  | 0.0383 | 1.35E-08 | 0.5231 | -0.107   | 0.0531 | 0.04385 |
| rs12755096 | <i>ALG14</i>  | a | 0.7643 | -0.1924 | 0.034  | 1.52E-08 | 0.8592 | -0.035   | 0.0709 | 0.622   |
| rs2797616  | <i>ALG14</i>  | t | 0.5172 | 0.1474  | 0.0261 | 1.61E-08 | 0.861  | 0.0283   | 0.081  | 0.7265  |
| rs4131811  | <i>ALG14</i>  | t | 0.2351 | 0.1806  | 0.0323 | 2.28E-08 | 0.1449 | 0.0203   | 0.0688 | 0.7683  |
| rs4615892  | <i>ALG14</i>  | t | 0.171  | 0.1965  | 0.0352 | 2.36E-08 | 0.0972 | 0.018    | 0.0802 | 0.8223  |
| rs11590106 | <i>ALG14</i>  | a | 0.7654 | -0.1803 | 0.0324 | 2.55E-08 | 0.8596 | -0.0294  | 0.0703 | 0.6757  |
| rs7417186  | <i>ALG14</i>  | t | 0.1707 | 0.1956  | 0.0351 | 2.58E-08 | 0.0972 | 0.0182   | 0.0801 | 0.8203  |
| rs1265168  | <i>CNN3</i>   | t | 0.8271 | -0.2051 | 0.037  | 2.91E-08 | 0.7603 | 0.0687   | 0.0611 | 0.2614  |
| rs2040048  | <i>CNN3</i>   | a | 0.5693 | -0.1496 | 0.0271 | 3.33E-08 | 0.6804 | 4.00E-04 | 0.0555 | 0.9944  |
| rs11590093 | <i>ALG14</i>  | a | 0.136  | 0.227   | 0.0416 | 4.98E-08 | NA     | NA       | NA     | NA      |
| rs11165305 | <i>TMEM56</i> | a | 0.3944 | 0.1522  | 0.0283 | 7.36E-08 | 0.6446 | 0.0752   | 0.0698 | 0.2813  |
| rs6687351  | <i>ALG14</i>  | a | 0.1838 | 0.1999  | 0.0373 | 8.40E-08 | 0.0967 | 0.0173   | 0.0809 | 0.8307  |
| rs6662345  | <i>ALG14</i>  | t | 0.184  | 0.1991  | 0.0373 | 9.27E-08 | 0.0967 | 0.0174   | 0.0809 | 0.8298  |
| rs6679106  | <i>ALG14</i>  | a | 0.8164 | -0.1993 | 0.0373 | 9.43E-08 | 0.9033 | -0.0173  | 0.0809 | 0.8308  |
| rs12239887 | <i>ALG14</i>  | a | 0.2105 | 0.1858  | 0.035  | 1.14E-07 | NA     | NA       | NA     | NA      |
| rs4619020  | <i>TMEM56</i> | t | 0.3993 | 0.1472  | 0.0279 | 1.35E-07 | 0.6373 | 0.0536   | 0.0542 | 0.3232  |
| rs7543042  | <i>RWDD3</i>  | t | 0.8889 | -0.2541 | 0.0484 | 1.50E-07 | 0.7631 | -0.0296  | 0.059  | 0.616   |
| rs12562716 | <i>TMEM56</i> | a | 0.5998 | -0.1462 | 0.0279 | 1.59E-07 | 0.3628 | -0.0538  | 0.0542 | 0.321   |
| rs6672436  | <i>TMEM56</i> | t | 0.4019 | 0.1455  | 0.0278 | 1.59E-07 | 0.637  | 0.054    | 0.0541 | 0.3185  |
| rs4128898  | <i>TMEM56</i> | c | 0.3994 | 0.1465  | 0.028  | 1.60E-07 | 0.638  | 0.053    | 0.0544 | 0.3297  |

|            |                 |   |        |         |        |          |        |         |        |         |
|------------|-----------------|---|--------|---------|--------|----------|--------|---------|--------|---------|
| rs1132     | <i>CNN3</i>     | a | 0.4766 | 0.1433  | 0.0273 | 1.62E-07 | 0.4782 | 0.049   | 0.0533 | 0.3576  |
| rs603424   | <i>PKD2L1</i>   | a | 0.1972 | 0.1891  | 0.0361 | 1.64E-07 | 0.0736 | 0.08    | 0.0933 | 0.3909  |
| rs1146460  | <i>CNN3</i>     | t | 0.5253 | 0.1363  | 0.0261 | 1.85E-07 | 0.4767 | 0.0519  | 0.0527 | 0.3256  |
| rs994988   | <i>GRIK2</i>    | t | 0.5333 | -0.1395 | 0.0269 | 2.10E-07 | 0.5973 | 0.1018  | 0.0516 | 0.0484  |
| rs6665763  | <i>TMEM56</i>   | t | 0.399  | 0.1413  | 0.0273 | 2.24E-07 | 0.6357 | 0.0559  | 0.0537 | 0.2974  |
| rs11807661 | <i>CNN3</i>     | a | 0.8585 | -0.1972 | 0.0382 | 2.43E-07 | NA     | NA      | NA     | NA      |
| rs1271952  | <i>CNN3</i>     | t | 0.4744 | -0.1342 | 0.0261 | 2.75E-07 | 0.5238 | -0.04   | 0.0525 | 0.4464  |
| rs6667676  | <i>ALG14</i>    | a | 0.3521 | 0.1468  | 0.0289 | 3.81E-07 | 0.2301 | 0.0727  | 0.0641 | 0.2571  |
| rs6666037  | <i>RWDD3</i>    | t | 0.9269 | -0.3021 | 0.0598 | 4.44E-07 | NA     | NA      | NA     | NA      |
| rs9322714  | <i>GRIK2</i>    | a | 0.4366 | 0.1305  | 0.0265 | 8.81E-07 | 0.1283 | -0.0652 | 0.0733 | 0.3739  |
| rs767015   | <i>CNN3</i>     | t | 0.4818 | 0.1325  | 0.027  | 8.90E-07 | 0.4764 | 0.0566  | 0.053  | 0.2855  |
| rs10414689 | <i>FLJ40235</i> | t | 0.9873 | 0.7818  | 0.1592 | 9.03E-07 | NA     | NA      | NA     | NA      |
| rs10809457 | <i>PTPRD</i>    | t | 0.4077 | -0.1394 | 0.0284 | 9.30E-07 | 0.1047 | 0.1297  | 0.0876 | 0.1384  |
| rs6474646  | <i>PTPRD</i>    | t | 0.5711 | 0.1332  | 0.0273 | 1.07E-06 | 0.8963 | -0.1238 | 0.0874 | 0.1568  |
| rs9499395  | <i>GRIK2</i>    | a | 0.4372 | 0.1313  | 0.027  | 1.21E-06 | 0.3393 | -0.1305 | 0.053  | 0.0138  |
| rs1246351  | <i>CNN3</i>     | a | 0.4666 | 0.1303  | 0.0269 | 1.25E-06 | 0.3772 | 0.0137  | 0.0544 | 0.8018  |
| rs4950077  | <i>TMEM56</i>   | a | 0.6362 | 0.132   | 0.0274 | 1.43E-06 | 0.8418 | 0.0545  | 0.0769 | 0.4784  |
| rs10237735 | <i>LSM5</i>     | t | 0.0123 | -0.7138 | 0.1482 | 1.46E-06 | NA     | NA      | NA     | NA      |
| rs1023330  | <i>TMEM56</i>   | t | 0.3642 | -0.1308 | 0.0274 | 1.79E-06 | 0.1473 | -0.0419 | 0.0776 | 0.5895  |
| rs2157552  | <i>GRIK2</i>    | a | 0.5511 | -0.1312 | 0.0275 | 1.79E-06 | 0.6696 | 0.1329  | 0.054  | 0.01379 |
| rs16927656 | <i>PTPRD</i>    | t | 0.4037 | -0.1348 | 0.0286 | 2.38E-06 | 0.0843 | 0.1638  | 0.0977 | 0.0938  |
| rs780093   | <i>GCKR</i>     | t | 0.4145 | 0.1261  | 0.0269 | 2.65E-06 | 0.5173 | 0.0274  | 0.0564 | 0.6271  |
| rs7561966  | <i>HS6ST1</i>   | a | 0.9878 | -0.6809 | 0.1462 | 3.19E-06 | NA     | NA      | NA     | NA      |
| rs1596341  | <i>PTPRD</i>    | a | 0.4022 | -0.127  | 0.0273 | 3.32E-06 | 0.0789 | 0.161   | 0.0984 | 0.102   |
| rs1260333  | <i>GCKR</i>     | a | 0.4617 | 0.1252  | 0.027  | 3.44E-06 | 0.5142 | 0.0188  | 0.0572 | 0.7428  |
| rs2911711  | <i>GCKR</i>     | a | 0.5385 | -0.1252 | 0.027  | 3.51E-06 | 0.4844 | -0.0241 | 0.0567 | 0.6706  |
| rs1887094  | <i>CNN3</i>     | c | 0.5434 | -0.1244 | 0.027  | 4.11E-06 | 0.7343 | -0.1155 | 0.0605 | 0.0565  |
| rs4946988  | <i>GRIK2</i>    | a | 0.4785 | -0.1242 | 0.027  | 4.17E-06 | 0.661  | 0.132   | 0.0529 | 0.0126  |
| rs10234749 | <i>XRCC2</i>    | t | 0.2467 | -0.1788 | 0.0389 | 4.21E-06 | 0.3859 | -0.0151 | 0.0573 | 0.792   |
| rs9390987  | <i>GRIK2</i>    | a | 0.5222 | 0.124   | 0.027  | 4.27E-06 | 0.3368 | -0.1312 | 0.0532 | 0.01373 |
| rs1980946  | <i>B4GALT5</i>  | c | 0.927  | -0.298  | 0.0649 | 4.44E-06 | NA     | NA      | NA     | NA      |
| rs9816269  | <i>ZNF659</i>   | t | 0.9637 | 0.3667  | 0.0801 | 4.64E-06 | 0.9612 | -0.0238 | 0.1483 | 0.8726  |
| rs6474664  | <i>PTPRD</i>    | a | 0.5931 | 0.1249  | 0.0273 | 4.66E-06 | 0.7643 | -0.0879 | 0.065  | 0.1765  |
| rs780094   | <i>GCKR</i>     | t | 0.4151 | 0.1227  | 0.0268 | 4.67E-06 | 0.5135 | 0.0279  | 0.0559 | 0.6175  |
| rs12297524 | <i>SLC15A4</i>  | t | 0.3816 | 0.1258  | 0.0275 | 4.82E-06 | 0.3446 | -0.0106 | 0.0571 | 0.8534  |
| rs17009275 | <i>ZNF659</i>   | t | 0.9638 | 0.3669  | 0.0802 | 4.82E-06 | 0.9612 | -0.0174 | 0.1479 | 0.9065  |
| rs11609257 | <i>SLC15A4</i>  | t | 0.3803 | 0.1251  | 0.0274 | 4.87E-06 | 0.3429 | -0.0106 | 0.0567 | 0.8523  |
| rs11059603 | <i>SLC15A4</i>  | t | 0.6198 | -0.1247 | 0.0274 | 5.24E-06 | 0.6567 | 0.0123  | 0.0569 | 0.8285  |
| rs10809437 | <i>PTPRD</i>    | t | 0.559  | 0.1229  | 0.027  | 5.26E-06 | 0.8957 | -0.1111 | 0.0873 | 0.2028  |
| rs1414202  | <i>PTPRD</i>    | t | 0.5576 | 0.1223  | 0.0269 | 5.26E-06 | 0.8954 | -0.1017 | 0.0868 | 0.2413  |
| rs3949548  | <i>PTPRD</i>    | a | 0.5586 | 0.1233  | 0.0271 | 5.33E-06 | 0.8954 | -0.1112 | 0.0873 | 0.203   |
| rs12825406 | <i>SLC15A4</i>  | a | 0.3804 | 0.1244  | 0.0274 | 5.53E-06 | 0.3421 | -0.0119 | 0.057  | 0.8352  |
| rs1980947  | <i>B4GALT5</i>  | c | 0.0727 | 0.2923  | 0.0644 | 5.71E-06 | 0.2102 | -0.0979 | 0.0617 | 0.1125  |
| rs1806267  | <i>RPAIN</i>    | t | 0.3811 | 0.1288  | 0.0284 | 5.76E-06 | 0.8388 | -0.0033 | 0.0703 | 0.9629  |
| rs2200946  | <i>ZNF659</i>   | t | 0.9666 | 0.3853  | 0.085  | 5.87E-06 | 0.9614 | 0.0166  | 0.1451 | 0.9089  |
| rs11022052 | <i>USP47</i>    | a | 0.0698 | 0.2785  | 0.0616 | 6.11E-06 | 0.2416 | -0.0525 | 0.0609 | 0.3886  |
| rs16910154 | <i>USP47</i>    | a | 0.9302 | -0.2715 | 0.0601 | 6.20E-06 | 0.7745 | 0.0666  | 0.0617 | 0.2804  |
| rs1514898  | <i>SLC15A4</i>  | a | 0.3803 | 0.124   | 0.0274 | 6.21E-06 | 0.3441 | -0.013  | 0.057  | 0.82    |

|            |                 |   |        |         |        |          |        |         |        |         |
|------------|-----------------|---|--------|---------|--------|----------|--------|---------|--------|---------|
| rs4609118  | <i>XRCC2</i>    | t | 0.2464 | -0.174  | 0.0385 | 6.22E-06 | 0.3946 | -0.0118 | 0.0582 | 0.8393  |
| rs7871636  | <i>PTPRD</i>    | t | 0.4009 | -0.1327 | 0.0294 | 6.45E-06 | 0.1775 | 0.1528  | 0.0719 | 0.03353 |
| rs16910189 | <i>USP47</i>    | a | 0.9307 | -0.2778 | 0.0618 | 6.91E-06 | 0.7583 | 0.0514  | 0.0609 | 0.3982  |
| rs9377470  | <i>GRIK2</i>    | c | 0.4797 | -0.12   | 0.0267 | 7.04E-06 | 0.6598 | 0.1315  | 0.0528 | 0.01283 |
| rs1260326  | <i>GCKR</i>     | t | 0.4278 | 0.1206  | 0.0269 | 7.53E-06 | 0.518  | 0.0269  | 0.0564 | 0.6334  |
| rs16910211 | <i>USP47</i>    | t | 0.9277 | -0.2731 | 0.0613 | 8.48E-06 | 0.7598 | 0.0493  | 0.0609 | 0.4186  |
| rs2382297  | <i>PTPRD</i>    | t | 0.3984 | -0.1314 | 0.0295 | 8.61E-06 | 0.169  | 0.1408  | 0.0729 | 0.05323 |
| rs11884682 | <i>HS6ST1</i>   | t | 0.0129 | 0.6277  | 0.1415 | 9.20E-06 | NA     | NA      | NA     | NA      |
| rs1476579  | <i>CDK5RAP3</i> | c | 0.2538 | 0.1357  | 0.0306 | 9.42E-06 | 0.27   | -0.0385 | 0.0578 | 0.5057  |
| rs12194134 | <i>GRIK2</i>    | a | 0.6108 | -0.1223 | 0.0277 | 9.81E-06 | 0.8572 | 0.1056  | 0.0689 | 0.1255  |
| rs1155127  | <i>GRIK2</i>    | c | 0.5168 | 0.1171  | 0.0265 | 9.90E-06 | 0.4039 | -0.1002 | 0.0516 | 0.05209 |
| rs12214154 | <i>GRIK2</i>    | t | 0.3869 | 0.1233  | 0.0279 | 9.96E-06 | 0.1428 | -0.1058 | 0.069  | 0.1253  |
| rs2207004  | <i>GRIK2</i>    | t | 0.6079 | -0.1234 | 0.028  | 1.03E-05 | 0.8577 | 0.1114  | 0.0698 | 0.1104  |
| rs12195907 | <i>GRIK2</i>    | a | 0.6082 | -0.1229 | 0.028  | 1.10E-05 | 0.8573 | 0.1085  | 0.0692 | 0.1171  |
| rs4945837  | <i>GRIK2</i>    | a | 0.4824 | -0.1163 | 0.0265 | 1.11E-05 | 0.5971 | 0.1016  | 0.0515 | 0.04867 |
| rs12524438 | <i>GRIK2</i>    | t | 0.3972 | 0.1183  | 0.0269 | 1.12E-05 | 0.1432 | -0.0946 | 0.0682 | 0.1657  |
| rs11200848 | <i>GHITM</i>    | a | 0.0712 | 0.27    | 0.0615 | 1.14E-05 | 0.2724 | -0.0051 | 0.0604 | 0.9332  |
| rs16910169 | <i>USP47</i>    | a | 0.9315 | -0.2366 | 0.0539 | 1.15E-05 | 0.7589 | 0.0519  | 0.0608 | 0.3939  |
| rs9287545  | <i>HS6ST1</i>   | a | 0.0129 | 0.6177  | 0.141  | 1.18E-05 | 0.1991 | 0.1392  | 0.0674 | 0.03885 |
| rs9287546  | <i>HS6ST1</i>   | a | 0.0129 | 0.6178  | 0.141  | 1.18E-05 | 0.199  | 0.1374  | 0.0674 | 0.04152 |
| rs1414904  | <i>TMEM56</i>   | t | 0.2906 | 0.1261  | 0.0288 | 1.22E-05 | 0.622  | 0.0469  | 0.0563 | 0.4049  |
| rs8065669  | <i>KPNB1</i>    | a | 0.4743 | -0.1166 | 0.0266 | 1.22E-05 | 0.3623 | 0.0668  | 0.0557 | 0.2304  |
| rs8072100  | <i>NPEPPS</i>   | a | 0.4729 | -0.1174 | 0.0268 | 1.22E-05 | 0.3603 | 0.0536  | 0.056  | 0.3385  |
| rs4857506  | <i>BDH1</i>     | t | 0.0522 | -0.3473 | 0.0794 | 1.23E-05 | 0.3837 | 0.1194  | 0.0694 | 0.08539 |
| rs6593594  | <i>TMEM56</i>   | t | 0.2898 | 0.1255  | 0.0287 | 1.26E-05 | 0.6227 | 0.047   | 0.0564 | 0.4046  |
| rs11870935 | <i>KPNB1</i>    | a | 0.5286 | 0.1157  | 0.0265 | 1.31E-05 | 0.6377 | -0.0694 | 0.0557 | 0.2131  |
| rs7743559  | <i>GRIK2</i>    | t | 0.4001 | 0.1176  | 0.027  | 1.31E-05 | 0.1427 | -0.0927 | 0.068  | 0.1727  |
| rs657820   | <i>RICS</i>     | c | 0.7414 | -0.1349 | 0.031  | 1.31E-05 | 0.7069 | -0.0753 | 0.0558 | 0.1772  |
| rs6899200  | <i>ZNF608</i>   | a | 0.0337 | 0.4161  | 0.0956 | 1.35E-05 | NA     | NA      | NA     | NA      |
| rs485238   | <i>GRIK2</i>    | a | 0.5453 | 0.1195  | 0.0275 | 1.41E-05 | 0.3332 | -0.133  | 0.0538 | 0.01347 |
| rs11156274 | <i>GRIK2</i>    | a | 0.6005 | -0.1165 | 0.0269 | 1.46E-05 | 0.8561 | 0.0948  | 0.0683 | 0.1651  |
| rs3768723  | <i>RHOQ</i>     | a | 0.8056 | 0.1453  | 0.0336 | 1.53E-05 | 0.9559 | 0.1846  | 0.1105 | 0.09477 |
| rs17035361 | <i>RHOQ</i>     | c | 0.8055 | 0.1449  | 0.0335 | 1.56E-05 | 0.9564 | 0.2078  | 0.1105 | 0.05996 |
| rs8025342  | <i>MCTP2</i>    | t | 0.2762 | 0.1316  | 0.0305 | 1.59E-05 | 0.4451 | -0.0536 | 0.0535 | 0.3167  |
| rs3809868  | <i>KPNB1</i>    | a | 0.528  | 0.1145  | 0.0265 | 1.62E-05 | 0.6385 | -0.0727 | 0.0559 | 0.1932  |
| rs11628693 | <i>RPS29</i>    | a | 0.4338 | -0.1141 | 0.0265 | 1.64E-05 | 0.5699 | 0.0059  | 0.0538 | 0.9127  |
| rs7210738  | <i>KPNB1</i>    | a | 0.5271 | 0.1145  | 0.0266 | 1.65E-05 | 0.6388 | -0.0727 | 0.0559 | 0.1928  |
| rs3118663  | <i>REXO4</i>    | a | 0.4937 | -0.1159 | 0.0269 | 1.69E-05 | 0.7126 | -0.095  | 0.0611 | 0.1197  |
| rs11165334 | <i>TMEM56</i>   | a | 0.7104 | -0.1222 | 0.0284 | 1.73E-05 | 0.3768 | -0.0443 | 0.0562 | 0.4304  |
| rs12452315 | <i>CI7orf57</i> | a | 0.5185 | 0.1166  | 0.0272 | 1.75E-05 | 0.7294 | -0.0672 | 0.0607 | 0.2683  |
| rs8072644  | <i>NPEPPS</i>   | a | 0.492  | -0.1171 | 0.0273 | 1.75E-05 | 0.4654 | 0.0282  | 0.0544 | 0.6038  |
| rs11165336 | <i>TMEM56</i>   | t | 0.7095 | -0.1227 | 0.0286 | 1.76E-05 | 0.3769 | -0.0475 | 0.0564 | 0.3994  |
| rs523279   | <i>GRIK2</i>    | t | 0.5075 | -0.1168 | 0.0272 | 1.78E-05 | 0.7543 | 0.1089  | 0.0606 | 0.07223 |
| rs9911944  | <i>CI7orf57</i> | t | 0.482  | -0.1164 | 0.0271 | 1.80E-05 | NA     | NA      | NA     | NA      |
| rs2965886  | <i>CI6orf72</i> | a | 0.7964 | -0.1522 | 0.0355 | 1.84E-05 | NA     | NA      | NA     | NA      |
| rs11165338 | <i>TMEM56</i>   | t | 0.7095 | -0.1224 | 0.0286 | 1.88E-05 | 0.3771 | -0.0482 | 0.0564 | 0.3922  |
| rs1060656  | <i>RHOQ</i>     | a | 0.8079 | 0.1454  | 0.034  | 1.89E-05 | 0.9563 | 0.2048  | 0.1107 | 0.06432 |
| rs3124776  | <i>REXO4</i>    | t | 0.5134 | 0.1178  | 0.0276 | 1.91E-05 | 0.2877 | 0.096   | 0.0614 | 0.1179  |

|            |                  |   |        |         |        |          |        |         |        |         |
|------------|------------------|---|--------|---------|--------|----------|--------|---------|--------|---------|
| rs4289035  | <i>NPEPPS</i>    | t | 0.4929 | -0.116  | 0.0271 | 1.92E-05 | 0.4674 | 0.0338  | 0.0541 | 0.5321  |
| rs13136959 | <i>HHIP</i>      | t | 0.9549 | -0.2998 | 0.0702 | 1.94E-05 | 0.8916 | 0.1771  | 0.0799 | 0.0267  |
| rs11871606 | <i>KPNB1</i>     | a | 0.5101 | 0.1151  | 0.027  | 1.94E-05 | 0.5312 | -0.0422 | 0.0541 | 0.4348  |
| rs11079784 | <i>NPEPPS</i>    | t | 0.4928 | -0.1159 | 0.0272 | 1.99E-05 | 0.4658 | 0.024   | 0.0546 | 0.6593  |
| rs10305700 | <i>ARNT</i>      | a | 0.9855 | 0.8484  | 0.1989 | 2.00E-05 | NA     | NA      | NA     | NA      |
| rs1981488  | <i>GRIK2</i>     | a | 0.496  | 0.1112  | 0.0261 | 2.01E-05 | 0.2453 | -0.1032 | 0.0602 | 0.08628 |
| rs1137748  | <i>RHOQ</i>      | c | 0.1925 | -0.1448 | 0.034  | 2.01E-05 | 0.0437 | -0.2049 | 0.1107 | 0.0641  |
| rs6068880  | <i>DOK5</i>      | a | 0.3685 | -0.1355 | 0.0318 | 2.02E-05 | 0.3491 | 0.0682  | 0.0657 | 0.2993  |
| rs8078880  | <i>NPEPPS</i>    | c | 0.5076 | 0.1163  | 0.0273 | 2.03E-05 | 0.534  | -0.027  | 0.0544 | 0.6192  |
| rs2790539  | <i>RPS29</i>     | t | 0.5585 | 0.1154  | 0.0271 | 2.03E-05 | 0.4376 | -0.0066 | 0.0535 | 0.9022  |
| rs7457887  | <i>XRCC2</i>     | t | 0.2772 | -0.1539 | 0.0361 | 2.06E-05 | 0.4201 | -0.0133 | 0.0573 | 0.8165  |
| rs3124782  | <i>REXO4</i>     | t | 0.4935 | -0.1155 | 0.0271 | 2.06E-05 | 0.6954 | -0.0501 | 0.0593 | 0.3977  |
| rs6756134  | <i>RHOQ</i>      | a | 0.8072 | 0.1444  | 0.0339 | 2.06E-05 | 0.9563 | 0.2051  | 0.1107 | 0.06384 |
| rs2223805  | <i>GRIK2</i>     | t | 0.585  | -0.1151 | 0.027  | 2.08E-05 | 0.8553 | 0.0918  | 0.0678 | 0.1759  |
| rs9635762  | <i>NPEPPS</i>    | a | 0.4922 | -0.1161 | 0.0273 | 2.09E-05 | 0.4715 | 0.0658  | 0.0683 | 0.3354  |
| rs17018847 | <i>PPP2R5A</i>   | a | 0.1893 | 0.1518  | 0.0357 | 2.12E-05 | 0.4574 | -0.0042 | 0.0511 | 0.9341  |
| rs4793978  | <i>NPEPPS</i>    | a | 0.5085 | 0.1158  | 0.0272 | 2.12E-05 | 0.5338 | -0.026  | 0.0544 | 0.6323  |
| rs16840284 | <i>GREM2</i>     | t | 0.9118 | -0.2236 | 0.0526 | 2.13E-05 | 0.7501 | 0.0373  | 0.0622 | 0.5492  |
| rs12943464 | <i>NPEPPS</i>    | a | 0.4923 | -0.1159 | 0.0273 | 2.13E-05 | 0.4661 | 0.0261  | 0.0544 | 0.6308  |
| rs1538619  | <i>RPS29</i>     | a | 0.443  | -0.1151 | 0.0271 | 2.14E-05 | 0.5631 | 0.0078  | 0.0536 | 0.8844  |
| rs3735290  | <i>OCM</i>       | t | 0.059  | 0.3214  | 0.0757 | 2.18E-05 | 0.1417 | -0.2015 | 0.0898 | 0.02476 |
| rs3760370  | <i>NPEPPS</i>    | t | 0.5078 | 0.1157  | 0.0273 | 2.19E-05 | 0.5339 | -0.0258 | 0.0544 | 0.6347  |
| rs4945830  | <i>GRIK2</i>     | t | 0.4599 | -0.1107 | 0.0261 | 2.21E-05 | 0.6961 | 0.1335  | 0.0566 | 0.01828 |
| rs859050   | <i>CNN3</i>      | a | 0.3815 | 0.1207  | 0.0285 | 2.24E-05 | 0.3152 | 0.0516  | 0.0589 | 0.3811  |
| rs7936477  | <i>LOC390243</i> | c | 0.8594 | 0.3428  | 0.0809 | 2.27E-05 | 0.8481 | 0.0466  | 0.1552 | 0.764   |
| rs4239162  | <i>KPNB1</i>     | a | 0.4904 | -0.1141 | 0.0269 | 2.27E-05 | 0.467  | 0.0477  | 0.0543 | 0.3794  |
| rs2905851  | <i>CDK5RAP3</i>  | a | 0.7025 | -0.1294 | 0.0306 | 2.28E-05 | 0.7302 | 0.0399  | 0.0579 | 0.49    |
| rs12782210 | <i>ZMIZ1</i>     | t | 0.0384 | -0.4804 | 0.1135 | 2.31E-05 | NA     | NA      | NA     | NA      |
| rs4239163  | <i>KPNB1</i>     | t | 0.4907 | -0.114  | 0.0269 | 2.33E-05 | 0.467  | 0.0477  | 0.0543 | 0.3793  |
| rs12299465 | <i>SLC15A4</i>   | t | 0.3692 | 0.1217  | 0.0288 | 2.35E-05 | 0.3265 | -0.0143 | 0.0602 | 0.8122  |
| rs6504872  | <i>C17orf57</i>  | t | 0.4818 | -0.1156 | 0.0273 | 2.36E-05 | 0.2703 | 0.0707  | 0.0609 | 0.2458  |
| rs7544426  | <i>AMPD2</i>     | t | 0.0528 | -0.2638 | 0.0624 | 2.36E-05 | 0.353  | 0.017   | 0.0553 | 0.7582  |
| rs1313546  | <i>LOC440093</i> | a | 0.3448 | -0.1327 | 0.0314 | 2.38E-05 | 0.2985 | -0.0055 | 0.0586 | 0.9249  |
| rs16840296 | <i>GREM2</i>     | t | 0.9117 | -0.2239 | 0.053  | 2.38E-05 | 0.7465 | 0.038   | 0.0632 | 0.5477  |
| rs2223806  | <i>GRIK2</i>     | t | 0.4033 | 0.1133  | 0.0268 | 2.39E-05 | 0.1445 | -0.0938 | 0.0702 | 0.1817  |
| rs17009299 | <i>ZNF659</i>    | t | 0.9623 | 0.3256  | 0.0771 | 2.40E-05 | 0.9603 | 0.022   | 0.1418 | 0.8766  |
| rs16840294 | <i>GREM2</i>     | t | 0.9116 | -0.2233 | 0.0529 | 2.42E-05 | 0.7464 | 0.0356  | 0.0628 | 0.5713  |
| rs729786   | <i>CDK5RAP3</i>  | t | 0.2672 | 0.1275  | 0.0302 | 2.42E-05 | 0.2647 | -0.0472 | 0.0586 | 0.4206  |
| rs729785   | <i>CDK5RAP3</i>  | a | 0.2674 | 0.1275  | 0.0302 | 2.42E-05 | 0.2648 | -0.0474 | 0.0586 | 0.419   |
| rs2597171  | <i>CDK5RAP3</i>  | t | 0.2658 | 0.1292  | 0.0306 | 2.45E-05 | 0.265  | -0.0485 | 0.0587 | 0.409   |
| rs2597173  | <i>CDK5RAP3</i>  | t | 0.7341 | -0.129  | 0.0306 | 2.45E-05 | 0.7347 | 0.0474  | 0.0586 | 0.4186  |
| rs2875746  | <i>CDK5RAP3</i>  | a | 0.2658 | 0.129   | 0.0306 | 2.45E-05 | 0.2653 | -0.0473 | 0.0586 | 0.4203  |
| rs2525087  | <i>CDK5RAP3</i>  | a | 0.734  | -0.1291 | 0.0306 | 2.45E-05 | 0.735  | 0.0484  | 0.0587 | 0.4095  |
| rs4794048  | <i>KPNB1</i>     | a | 0.5285 | 0.1122  | 0.0266 | 2.49E-05 | 0.6402 | -0.0727 | 0.0558 | 0.1923  |
| rs2208332  | <i>GRIK2</i>     | a | 0.4677 | -0.1117 | 0.0265 | 2.51E-05 | 0.6681 | 0.1213  | 0.0531 | 0.02241 |
| rs9322709  | <i>GRIK2</i>     | t | 0.4693 | -0.112  | 0.0266 | 2.53E-05 | 0.6709 | 0.1226  | 0.053  | 0.02068 |
| rs2525088  | <i>CDK5RAP3</i>  | t | 0.7342 | -0.1286 | 0.0306 | 2.58E-05 | 0.7347 | 0.0538  | 0.0587 | 0.3595  |
| rs11119891 | <i>PPP2R5A</i>   | a | 0.1909 | 0.1493  | 0.0355 | 2.60E-05 | 0.459  | -0.0094 | 0.051  | 0.8535  |

|            |                 |   |        |         |        |          |        |         |        |         |
|------------|-----------------|---|--------|---------|--------|----------|--------|---------|--------|---------|
| rs2597179  | <i>CDK5RAP3</i> | c | 0.7334 | -0.1269 | 0.0302 | 2.61E-05 | 0.7352 | 0.0471  | 0.0586 | 0.4216  |
| rs10143922 | <i>RPS29</i>    | t | 0.5383 | 0.1163  | 0.0277 | 2.62E-05 | 0.4251 | -0.0288 | 0.0671 | 0.6673  |
| rs7308583  | <i>TMEM16F</i>  | t | 0.9871 | 1.0404  | 0.2477 | 2.67E-05 | NA     | NA      | NA     | NA      |
| rs2597174  | <i>CDK5RAP3</i> | a | 0.7345 | -0.1283 | 0.0306 | 2.70E-05 | 0.7347 | 0.0474  | 0.0586 | 0.4184  |
| rs1008965  | <i>GRIK2</i>    | t | 0.46   | -0.1095 | 0.0261 | 2.73E-05 | 0.6708 | 0.1183  | 0.0529 | 0.02528 |
| rs10168498 | <i>C2orf55</i>  | t | 0.1368 | 0.1764  | 0.0421 | 2.75E-05 | 0.0212 | -0.0127 | 0.1796 | 0.9434  |
| rs1953917  | <i>RPS29</i>    | t | 0.5654 | 0.1125  | 0.0268 | 2.77E-05 | 0.4302 | -0.0138 | 0.0538 | 0.7975  |
| rs1806261  | <i>RPAIN</i>    | a | 0.5937 | -0.1154 | 0.0275 | 2.79E-05 | 0.0263 | -0.1145 | 0.1536 | 0.4559  |
| rs2905852  | <i>CDK5RAP3</i> | t | 0.2693 | 0.1251  | 0.0299 | 2.84E-05 | 0.27   | -0.0385 | 0.0578 | 0.5058  |
| rs2905850  | <i>CDK5RAP3</i> | a | 0.2697 | 0.1249  | 0.0298 | 2.84E-05 | NA     | NA      | NA     | NA      |
| rs737130   | <i>CDK5RAP3</i> | a | 0.2701 | 0.1248  | 0.0298 | 2.84E-05 | 0.27   | -0.0385 | 0.0578 | 0.5058  |
| rs2784149  | <i>KCNC4</i>    | c | 0.3073 | -0.1397 | 0.0334 | 2.85E-05 | 0.4534 | 0.017   | 0.0548 | 0.7561  |
| rs739853   | <i>CDK5RAP3</i> | a | 0.7295 | -0.1245 | 0.0298 | 2.87E-05 | 0.7348 | 0.045   | 0.0586 | 0.4425  |

*SNP* Single nucleotide polymorphism, *EAF* Effect allele frequency

<sup>a</sup> These results in European ancestry populations have been published previously by Wu et al.

<sup>b</sup> Regression coefficient associated with one copy of the effect allele.

**Supplemental Table 10** Replication of 18:0 related top SNPs with  $P < 5 \times 10^{-6}$  identified in European ancestry populations <sup>a</sup>

| SNP        | Closest Gene    | Effect allele | European ancestry populations |                     |                 |          | Chinese populations |                     |                 |          |
|------------|-----------------|---------------|-------------------------------|---------------------|-----------------|----------|---------------------|---------------------|-----------------|----------|
|            |                 |               | EAF                           | Effect <sup>b</sup> | SE <sup>b</sup> | $P^b$    | EAF                 | Effect <sup>b</sup> | SE <sup>b</sup> | $P^b$    |
| rs102275   | <i>C11orf10</i> | t             | 0.6776                        | 0.1798              | 0.0193          | 1.33E-20 | 0.5937              | 0.1908              | 0.0434          | 1.12E-05 |
| rs174537   | <i>C11orf9</i>  | t             | 0.3195                        | -0.1788             | 0.0193          | 2.17E-20 | 0.4047              | -0.1874             | 0.0433          | 1.50E-05 |
| rs174536   | <i>C11orf9</i>  | a             | 0.679                         | 0.1776              | 0.0194          | 4.32E-20 | 0.5948              | 0.1897              | 0.0434          | 1.21E-05 |
| rs174535   | <i>C11orf9</i>  | t             | 0.6788                        | 0.1777              | 0.0194          | 4.33E-20 | 0.5946              | 0.19                | 0.0434          | 1.18E-05 |
| rs174547   | <i>FADS1</i>    | t             | 0.6812                        | 0.1773              | 0.0193          | 4.42E-20 | 0.5956              | 0.1857              | 0.0434          | 1.86E-05 |
| rs174545   | <i>FADS1</i>    | c             | 0.6808                        | 0.1771              | 0.0193          | 4.75E-20 | 0.5956              | 0.1857              | 0.0434          | 1.85E-05 |
| rs174546   | <i>FADS1</i>    | t             | 0.3193                        | -0.1765             | 0.0193          | 5.49E-20 | 0.4042              | -0.1844             | 0.0434          | 2.10E-05 |
| rs174550   | <i>FADS1</i>    | t             | 0.6805                        | 0.1755              | 0.0193          | 1.07E-19 | 0.5957              | 0.1857              | 0.0434          | 1.86E-05 |
| rs174574   | <i>FADS2</i>    | a             | 0.3248                        | -0.1733             | 0.0194          | 3.69E-19 | 0.4058              | -0.1852             | 0.0434          | 1.99E-05 |
| rs1535     | <i>FADS2</i>    | a             | 0.6777                        | 0.1719              | 0.0193          | 5.04E-19 | 0.5954              | 0.1848              | 0.0434          | 2.02E-05 |
| rs174549   | <i>FADS1</i>    | a             | 0.2802                        | -0.1757             | 0.0198          | 6.57E-19 | 0.4044              | -0.1841             | 0.043           | 1.82E-05 |
| rs174576   | <i>FADS2</i>    | a             | 0.3319                        | -0.1735             | 0.0196          | 7.82E-19 | 0.4057              | -0.1795             | 0.0433          | 3.34E-05 |
| rs174577   | <i>FADS2</i>    | a             | 0.3324                        | -0.1732             | 0.0196          | 7.99E-19 | 0.4055              | -0.1808             | 0.0433          | 3.00E-05 |
| rs174583   | <i>FADS2</i>    | t             | 0.3365                        | -0.1734             | 0.0196          | 9.91E-19 | 0.5915              | -0.2818             | 0.0964          | 0.00348  |
| rs174578   | <i>FADS2</i>    | a             | 0.3341                        | -0.1731             | 0.0196          | 1.17E-18 | 0.4055              | -0.1813             | 0.0433          | 2.86E-05 |
| rs174541   | <i>FADS1</i>    | t             | 0.6578                        | 0.1711              | 0.0194          | 1.19E-18 | 0.5954              | 0.1865              | 0.0434          | 1.74E-05 |
| rs174548   | <i>FADS1</i>    | c             | 0.7186                        | 0.1731              | 0.0197          | 1.61E-18 | 0.5956              | 0.1841              | 0.043           | 1.82E-05 |
| rs6675668  | <i>ALG14</i>    | t             | 0.4898                        | -0.1651             | 0.0189          | 2.16E-18 | 0.8177              | -0.031              | 0.0511          | 0.5434   |
| rs4246215  | <i>FEN1</i>     | t             | 0.3417                        | -0.1697             | 0.0194          | 2.24E-18 | 0.4035              | -0.1831             | 0.0434          | 2.46E-05 |
| rs174555   | <i>FADS1</i>    | t             | 0.7186                        | 0.1722              | 0.0197          | 2.36E-18 | 0.5958              | 0.1834              | 0.043           | 1.95E-05 |
| rs6687388  | <i>ALG14</i>    | t             | 0.4388                        | 0.1671              | 0.0192          | 2.88E-18 | 0.1819              | 0.0288              | 0.0511          | 0.5725   |
| rs174556   | <i>FADS1</i>    | t             | 0.2813                        | -0.1695             | 0.0195          | 4.19E-18 | 0.4003              | -0.1772             | 0.043           | 3.77E-05 |
| rs10874902 | <i>ALG14</i>    | a             | 0.5689                        | -0.1704             | 0.0197          | 4.60E-18 | 0.8183              | -0.029              | 0.0511          | 0.5706   |
| rs2391388  | <i>ALG14</i>    | a             | 0.5421                        | 0.1592              | 0.0185          | 6.80E-18 | 0.1789              | 0.0365              | 0.0513          | 0.4768   |
| rs10735790 | <i>ALG14</i>    | t             | 0.4399                        | 0.1646              | 0.0191          | 7.24E-18 | 0.1734              | 0.0291              | 0.0532          | 0.5843   |
| rs11585462 | <i>ALG14</i>    | a             | 0.4356                        | 0.1673              | 0.0195          | 8.61E-18 | 0.182               | 0.0281              | 0.051           | 0.5819   |
| rs4339907  | <i>ALG14</i>    | a             | 0.4409                        | 0.1675              | 0.0196          | 1.17E-17 | 0.1817              | 0.0284              | 0.0512          | 0.5792   |
| rs7537374  | <i>ALG14</i>    | a             | 0.4994                        | 0.1578              | 0.0185          | 1.37E-17 | 0.179               | 0.0387              | 0.0513          | 0.4505   |
| rs174601   | <i>FADS2</i>    | t             | 0.366                         | -0.1832             | 0.0216          | 2.06E-17 | 0.4118              | -0.2025             | 0.0452          | 7.39E-06 |
| rs11591183 | <i>TMEM56</i>   | t             | 0.5779                        | -0.1574             | 0.0186          | 2.18E-17 | 0.8195              | -0.0323             | 0.051           | 0.5268   |
| rs12741128 | <i>TMEM56</i>   | t             | 0.4168                        | 0.1581              | 0.0187          | 2.56E-17 | 0.1783              | 0.0349              | 0.0521          | 0.5028   |
| rs12569207 | <i>ALG14</i>    | a             | 0.4225                        | 0.1568              | 0.0185          | 2.64E-17 | 0.181               | 0.0315              | 0.0509          | 0.5354   |
| rs4630159  | <i>ALG14</i>    | t             | 0.4265                        | 0.1621              | 0.0192          | 2.81E-17 | 0.1819              | 0.0291              | 0.0506          | 0.5657   |
| rs4949965  | <i>ALG14</i>    | a             | 0.5764                        | -0.1572             | 0.0186          | 3.07E-17 | 0.8185              | -0.0296             | 0.0508          | 0.5597   |
| rs6687450  | <i>ALG14</i>    | t             | 0.4239                        | 0.16                | 0.0189          | 3.10E-17 | 0.1664              | 0.0388              | 0.0551          | 0.4815   |
| rs4390223  | <i>ALG14</i>    | t             | 0.5776                        | -0.1561             | 0.0185          | 3.33E-17 | 0.819               | -0.0316             | 0.0509          | 0.5339   |
| rs9437812  | <i>ALG14</i>    | a             | 0.577                         | -0.1605             | 0.0191          | 3.86E-17 | 0.8184              | -0.0295             | 0.0507          | 0.5605   |
| rs4950058  | <i>ALG14</i>    | t             | 0.5781                        | -0.1601             | 0.019           | 4.15E-17 | 0.8184              | -0.0295             | 0.0507          | 0.5604   |
| rs2797623  | <i>ALG14</i>    | a             | 0.4942                        | -0.1542             | 0.0184          | 5.53E-17 | 0.847               | -0.0542             | 0.0562          | 0.3346   |
| rs7547662  | <i>ALG14</i>    | t             | 0.4943                        | -0.1534             | 0.0184          | 7.12E-17 | 0.8344              | -0.0464             | 0.0547          | 0.3968   |
| rs7533303  | <i>ALG14</i>    | t             | 0.5024                        | 0.1523              | 0.0183          | 7.98E-17 | 0.1777              | 0.0414              | 0.0524          | 0.4294   |
| rs4847220  | <i>ALG14</i>    | a             | 0.4277                        | 0.1558              | 0.0187          | 8.00E-17 | 0.1746              | 0.0406              | 0.0526          | 0.4397   |
| rs6698046  | <i>ALG14</i>    | a             | 0.4278                        | 0.1533              | 0.0186          | 1.61E-16 | 0.1537              | 0.0414              | 0.0549          | 0.4515   |
| rs174528   | <i>C11orf9</i>  | t             | 0.6389                        | 0.1601              | 0.0195          | 2.38E-16 | 0.5885              | 0.1941              | 0.0434          | 7.77E-06 |
| rs2797622  | <i>ALG14</i>    | a             | 0.5721                        | -0.1518             | 0.0185          | 2.54E-16 | 0.8476              | -0.0535             | 0.0563          | 0.3416   |

|            |                 |   |        |         |        |          |        |         |        |          |
|------------|-----------------|---|--------|---------|--------|----------|--------|---------|--------|----------|
| rs2766010  | <i>ALG14</i>    | t | 0.5724 | -0.1508 | 0.0184 | 3.02E-16 | 0.8488 | -0.0514 | 0.0563 | 0.3611   |
| rs174538   | <i>C11orf10</i> | a | 0.2876 | -0.1669 | 0.0206 | 4.87E-16 | 0.4048 | -0.1872 | 0.0434 | 1.59E-05 |
| rs6671200  | <i>RWDD3</i>    | a | 0.0884 | -0.2461 | 0.0309 | 1.76E-15 | NA     | NA      | NA     | NA       |
| rs10493880 | <i>ALG14</i>    | t | 0.4305 | 0.1482  | 0.0186 | 1.81E-15 | 0.2233 | -0.0227 | 0.0482 | 0.6377   |
| rs6678964  | <i>RWDD3</i>    | a | 0.0891 | -0.2441 | 0.0309 | 2.69E-15 | NA     | NA      | NA     | NA       |
| rs259357   | <i>RWDD3</i>    | t | 0.912  | 0.2456  | 0.0311 | 2.79E-15 | NA     | NA      | NA     | NA       |
| rs259350   | <i>RWDD3</i>    | c | 0.9086 | 0.2456  | 0.0312 | 3.15E-15 | NA     | NA      | NA     | NA       |
| rs9437689  | <i>ALG14</i>    | t | 0.4517 | 0.1529  | 0.0195 | 3.92E-15 | 0.1828 | 0.0309  | 0.0509 | 0.5429   |
| rs259346   | <i>RWDD3</i>    | a | 0.0879 | -0.2533 | 0.0323 | 4.68E-15 | NA     | NA      | NA     | NA       |
| rs12755552 | <i>RWDD3</i>    | a | 0.9085 | 0.2401  | 0.0309 | 8.12E-15 | NA     | NA      | NA     | NA       |
| rs10747468 | <i>RWDD3</i>    | t | 0.0915 | -0.2389 | 0.0309 | 1.07E-14 | NA     | NA      | NA     | NA       |
| rs933107   | <i>TMEM56</i>   | t | 0.908  | 0.2364  | 0.0307 | 1.32E-14 | NA     | NA      | NA     | NA       |
| rs12749053 | <i>TMEM56</i>   | a | 0.908  | 0.2361  | 0.0307 | 1.33E-14 | NA     | NA      | NA     | NA       |
| rs11165339 | <i>TMEM56</i>   | t | 0.0917 | -0.2368 | 0.0308 | 1.38E-14 | NA     | NA      | NA     | NA       |
| rs860873   | <i>CNN3</i>     | a | 0.4385 | 0.1472  | 0.0193 | 2.19E-14 | 0.1666 | 0.0189  | 0.0549 | 0.7305   |
| rs2766005  | <i>ALG14</i>    | a | 0.4328 | -0.1381 | 0.0181 | 2.45E-14 | 0.8631 | -0.0619 | 0.0588 | 0.2922   |
| rs2391391  | <i>ALG14</i>    | a | 0.2815 | -0.1516 | 0.0205 | 1.26E-13 | 0.2424 | 0.0579  | 0.0473 | 0.2204   |
| rs1146461  | <i>CNN3</i>     | a | 0.5761 | -0.1372 | 0.0188 | 2.98E-13 | 0.8822 | -0.0601 | 0.0642 | 0.3492   |
| rs2298162  | <i>ALG14</i>    | t | 0.6324 | 0.1358  | 0.0186 | 3.14E-13 | 0.2426 | 0.0314  | 0.0468 | 0.5013   |
| rs1265169  | <i>CNN3</i>     | c | 0.4314 | 0.1382  | 0.019  | 3.52E-13 | 0.1176 | 0.0615  | 0.0646 | 0.3412   |
| rs2797616  | <i>ALG14</i>    | t | 0.526  | -0.131  | 0.0184 | 9.96E-13 | 0.8611 | -0.0634 | 0.0592 | 0.2845   |
| rs6674604  | <i>ALG14</i>    | a | 0.1938 | -0.1646 | 0.0232 | 1.19E-12 | 0.145  | 0.1274  | 0.0582 | 0.0286   |
| rs6671842  | <i>ALG14</i>    | t | 0.1951 | -0.1638 | 0.0231 | 1.21E-12 | 0.1901 | 0.1049  | 0.0618 | 0.08961  |
| rs174534   | <i>C11orf9</i>  | a | 0.6725 | 0.1444  | 0.0203 | 1.26E-12 | 0.5902 | 0.1941  | 0.0431 | 6.64E-06 |
| rs108499   | <i>C11orf9</i>  | t | 0.3291 | -0.1453 | 0.0205 | 1.29E-12 | 0.4119 | -0.1921 | 0.0432 | 8.55E-06 |
| rs12760863 | <i>ALG14</i>    | a | 0.1989 | -0.17   | 0.024  | 1.29E-12 | 0.1449 | 0.1384  | 0.0585 | 0.018    |
| rs11165297 | <i>ALG14</i>    | a | 0.1904 | -0.1694 | 0.024  | 1.57E-12 | 0.1452 | 0.1295  | 0.0583 | 0.02631  |
| rs6698894  | <i>ALG14</i>    | t | 0.8072 | 0.1665  | 0.0236 | 1.68E-12 | NA     | NA      | NA     | NA       |
| rs7540821  | <i>ALG14</i>    | a | 0.8021 | 0.1632  | 0.0231 | 1.76E-12 | 0.8513 | -0.1128 | 0.0571 | 0.0483   |
| rs12751633 | <i>ALG14</i>    | t | 0.8007 | 0.1629  | 0.0231 | 1.96E-12 | 0.8513 | -0.1131 | 0.0571 | 0.04749  |
| rs859044   | <i>CNN3</i>     | a | 0.3135 | 0.1446  | 0.0207 | 3.04E-12 | 0.2084 | 0.018   | 0.0578 | 0.755    |
| rs11165305 | <i>TMEM56</i>   | a | 0.4032 | -0.1362 | 0.0196 | 3.90E-12 | 0.6446 | -0.0235 | 0.0467 | 0.6149   |
| rs859046   | <i>CNN3</i>     | t | 0.3171 | 0.1395  | 0.0201 | 4.40E-12 | 0.1952 | 0.0195  | 0.0509 | 0.7017   |
| rs2040048  | <i>CNN3</i>     | a | 0.5609 | 0.1273  | 0.0184 | 4.97E-12 | 0.6804 | 0.0099  | 0.0431 | 0.8179   |
| rs6672436  | <i>TMEM56</i>   | t | 0.4102 | -0.133  | 0.0193 | 5.13E-12 | 0.6405 | -0.0568 | 0.0415 | 0.1714   |
| rs6665763  | <i>TMEM56</i>   | t | 0.4073 | -0.1298 | 0.0189 | 6.02E-12 | 0.6387 | -0.0562 | 0.0411 | 0.1711   |
| rs12562716 | <i>TMEM56</i>   | a | 0.5915 | 0.1329  | 0.0194 | 6.75E-12 | 0.3593 | 0.0569  | 0.0416 | 0.1712   |
| rs4619020  | <i>TMEM56</i>   | t | 0.4077 | -0.1333 | 0.0194 | 6.87E-12 | 0.6409 | -0.057  | 0.0416 | 0.171    |
| rs6666037  | <i>RWDD3</i>    | t | 0.9242 | 0.2604  | 0.038  | 7.36E-12 | NA     | NA      | NA     | NA       |
| rs11165281 | <i>ALG14</i>    | t | 0.1658 | -0.1678 | 0.0245 | 7.73E-12 | 0.1818 | -0.1086 | 0.052  | 0.03676  |
| rs6672045  | <i>ALG14</i>    | t | 0.8362 | 0.1697  | 0.0248 | 8.60E-12 | NA     | NA      | NA     | NA       |
| rs3753872  | <i>RWDD3</i>    | t | 0.1312 | -0.183  | 0.0268 | 9.15E-12 | 0.2566 | -0.0719 | 0.0456 | 0.1148   |
| rs4128898  | <i>TMEM56</i>   | c | 0.4083 | -0.1326 | 0.0195 | 9.43E-12 | 0.6417 | -0.0573 | 0.0418 | 0.17     |
| rs11590106 | <i>ALG14</i>    | a | 0.7641 | 0.1507  | 0.0221 | 9.77E-12 | 0.8549 | -0.1255 | 0.0582 | 0.03096  |
| rs2296308  | <i>RWDD3</i>    | t | 0.1302 | -0.183  | 0.0269 | 9.80E-12 | 0.2465 | -0.0718 | 0.0455 | 0.1148   |
| rs2147587  | <i>RWDD3</i>    | a | 0.8698 | 0.183   | 0.0269 | 9.83E-12 | 0.7453 | 0.0564  | 0.046  | 0.2202   |
| rs7528790  | <i>RWDD3</i>    | a | 0.1305 | -0.1831 | 0.0269 | 1.00E-11 | 0.2465 | -0.072  | 0.0455 | 0.1136   |
| rs12092678 | <i>ALG14</i>    | t | 0.8267 | 0.1638  | 0.0242 | 1.30E-11 | 0.9197 | 0.0612  | 0.0751 | 0.4145   |

|            |               |   |        |         |        |          |        |         |        |          |
|------------|---------------|---|--------|---------|--------|----------|--------|---------|--------|----------|
| rs4131811  | <i>ALG14</i>  | t | 0.2364 | -0.1495 | 0.0221 | 1.34E-11 | 0.1488 | 0.1135  | 0.0573 | 0.04764  |
| rs1146460  | <i>CNN3</i>   | t | 0.5328 | -0.1236 | 0.0184 | 1.83E-11 | 0.4745 | -0.0198 | 0.0402 | 0.6224   |
| rs12755096 | <i>ALG14</i>  | a | 0.7638 | 0.1549  | 0.0232 | 2.41E-11 | 0.8548 | -0.1353 | 0.0584 | 0.02053  |
| rs1271952  | <i>CNN3</i>   | t | 0.4668 | 0.1215  | 0.0183 | 3.21E-11 | 0.5257 | 0.0293  | 0.0402 | 0.4655   |
| rs13375406 | <i>TMEM56</i> | c | 0.0922 | -0.2113 | 0.0323 | 5.86E-11 | NA     | NA      | NA     | NA       |
| rs2727270  | <i>FADS2</i>  | t | 0.1097 | -0.1775 | 0.0273 | 7.74E-11 | 0.3148 | -0.166  | 0.0451 | 0.000232 |
| rs2727271  | <i>FADS2</i>  | a | 0.8902 | 0.1768  | 0.0273 | 8.97E-11 | 0.6852 | 0.166   | 0.0451 | 0.000232 |
| rs4950077  | <i>TMEM56</i> | a | 0.6419 | -0.1225 | 0.0192 | 1.75E-10 | 0.8405 | -0.0537 | 0.0561 | 0.3386   |
| rs174575   | <i>FADS2</i>  | c | 0.7483 | 0.1396  | 0.022  | 2.05E-10 | 0.8819 | 0.0869  | 0.0668 | 0.1935   |
| rs2072114  | <i>FADS2</i>  | a | 0.8844 | 0.1672  | 0.0265 | 2.58E-10 | 0.6855 | 0.1646  | 0.045  | 0.000258 |
| rs1023330  | <i>TMEM56</i> | t | 0.3584 | 0.1213  | 0.0192 | 2.61E-10 | 0.1476 | 0.0642  | 0.0572 | 0.2622   |
| rs2524299  | <i>FADS2</i>  | a | 0.8882 | 0.1671  | 0.0269 | 4.88E-10 | 0.6851 | 0.1658  | 0.045  | 0.000232 |
| rs6697256  | <i>TMEM56</i> | a | 0.1513 | -0.1612 | 0.026  | 5.95E-10 | 0.394  | -0.0181 | 0.0406 | 0.6565   |
| rs6680551  | <i>TMEM56</i> | a | 0.1514 | -0.154  | 0.0251 | 8.61E-10 | 0.393  | -0.0197 | 0.0405 | 0.6272   |
| rs11589700 | <i>ALG14</i>  | t | 0.1037 | -0.1781 | 0.0294 | 1.33E-09 | NA     | NA      | NA     | NA       |
| rs1132     | <i>CNN3</i>   | a | 0.4865 | -0.1162 | 0.0194 | 2.23E-09 | 0.4752 | -0.0196 | 0.0405 | 0.6281   |
| rs684448   | <i>RWDD3</i>  | t | 0.1747 | -0.1404 | 0.0235 | 2.31E-09 | 0.1706 | 0.0634  | 0.0536 | 0.2363   |
| rs11586384 | <i>ALG14</i>  | a | 0.1025 | -0.1861 | 0.0312 | 2.33E-09 | NA     | NA      | NA     | NA       |
| rs859040   | <i>CNN3</i>   | t | 0.1501 | -0.1498 | 0.0252 | 2.60E-09 | 0.5247 | -0.0301 | 0.0403 | 0.4558   |
| rs11119805 | <i>LPGAT1</i> | a | 0.1226 | -0.1678 | 0.0282 | 2.80E-09 | 0.1453 | -0.0552 | 0.0543 | 0.31     |
| rs174602   | <i>FADS2</i>  | t | 0.8002 | 0.2071  | 0.035  | 3.25E-09 | 0.7207 | 0.2525  | 0.0615 | 4.05E-05 |
| rs1803468  | <i>LPGAT1</i> | a | 0.1219 | -0.1703 | 0.0289 | 3.68E-09 | 0.1712 | -0.0512 | 0.0511 | 0.317    |
| rs174570   | <i>FADS2</i>  | t | 0.1273 | -0.1622 | 0.0276 | 4.01E-09 | 0.4014 | -0.1807 | 0.0434 | 3.08E-05 |
| rs11801110 | <i>ALG14</i>  | t | 0.1469 | -0.1541 | 0.0263 | 4.87E-09 | 0.1012 | 0.1529  | 0.0662 | 0.02094  |
| rs12739445 | <i>ALG14</i>  | c | 0.0984 | -0.1952 | 0.0334 | 5.16E-09 | NA     | NA      | NA     | NA       |
| rs12121773 | <i>LPGAT1</i> | t | 0.1261 | -0.164  | 0.0281 | 5.19E-09 | 0.1706 | -0.0511 | 0.051  | 0.3162   |
| rs10783010 | <i>RWDD3</i>  | a | 0.1767 | -0.1395 | 0.0239 | 5.23E-09 | NA     | NA      | NA     | NA       |
| rs864553   | <i>CNN3</i>   | c | 0.1483 | -0.1545 | 0.0265 | 5.46E-09 | 0.524  | -0.0294 | 0.0408 | 0.4711   |
| rs12751061 | <i>ALG14</i>  | a | 0.8993 | 0.1902  | 0.0327 | 5.83E-09 | NA     | NA      | NA     | NA       |
| rs10465759 | <i>ALG14</i>  | t | 0.8525 | 0.1488  | 0.0256 | 5.85E-09 | 0.8985 | -0.1295 | 0.0658 | 0.049    |
| rs6684137  | <i>ALG14</i>  | a | 0.1457 | -0.1562 | 0.0268 | 5.86E-09 | 0.1012 | 0.1547  | 0.0665 | 0.01996  |
| rs174591   | <i>FADS2</i>  | a | 0.2785 | -0.1354 | 0.0233 | 6.02E-09 | 0.1142 | -0.1015 | 0.069  | 0.1412   |
| rs1415564  | <i>RWDD3</i>  | t | 0.1793 | -0.1394 | 0.024  | 6.03E-09 | 0.1693 | 0.0639  | 0.0553 | 0.2476   |
| rs4387224  | <i>ALG14</i>  | t | 0.8536 | 0.1526  | 0.0263 | 6.30E-09 | 0.8988 | -0.1531 | 0.0662 | 0.02079  |
| rs767015   | <i>CNN3</i>   | t | 0.4907 | -0.1105 | 0.019  | 6.41E-09 | 0.4743 | -0.0209 | 0.0403 | 0.6037   |
| rs12046116 | <i>LPGAT1</i> | c | 0.1254 | -0.1661 | 0.0287 | 7.40E-09 | 0.1716 | -0.0504 | 0.0509 | 0.3222   |
| rs6674467  | <i>ALG14</i>  | a | 0.144  | -0.1562 | 0.027  | 7.45E-09 | 0.1015 | 0.1393  | 0.066  | 0.03469  |
| rs6678809  | <i>ALG14</i>  | c | 0.8535 | 0.153   | 0.0265 | 7.66E-09 | 0.8988 | -0.1533 | 0.0663 | 0.02073  |
| rs3890785  | <i>ALG14</i>  | t | 0.8543 | 0.1524  | 0.0264 | 7.72E-09 | 0.8988 | -0.1529 | 0.0662 | 0.02091  |
| rs12023263 | <i>LPGAT1</i> | t | 0.1253 | -0.1646 | 0.0287 | 9.87E-09 | 0.1713 | -0.0483 | 0.051  | 0.343    |
| rs6667676  | <i>ALG14</i>  | a | 0.3552 | -0.1101 | 0.0195 | 1.53E-08 | 0.2299 | -0.0557 | 0.0482 | 0.2478   |
| rs11119810 | <i>LPGAT1</i> | a | 0.1259 | -0.1627 | 0.0288 | 1.59E-08 | 0.1714 | -0.0497 | 0.051  | 0.3295   |
| rs12126561 | <i>LPGAT1</i> | c | 0.8742 | 0.1627  | 0.0288 | 1.59E-08 | 0.8286 | 0.0496  | 0.0509 | 0.3303   |
| rs1246351  | <i>CNN3</i>   | a | 0.4686 | -0.1051 | 0.0187 | 1.77E-08 | 0.3745 | -0.0148 | 0.0415 | 0.7214   |
| rs7543042  | <i>RWDD3</i>  | t | 0.8874 | 0.1772  | 0.032  | 3.17E-08 | 0.7579 | 0.0779  | 0.0462 | 0.09144  |
| rs17042024 | <i>LPGAT1</i> | t | 0.8994 | 0.1689  | 0.0309 | 4.73E-08 | 0.8637 | 0.0516  | 0.0554 | 0.3516   |
| rs2845573  | <i>FADS2</i>  | a | 0.9259 | 0.1786  | 0.0328 | 5.07E-08 | 0.6875 | 0.1727  | 0.0458 | 0.000166 |
| rs2851682  | <i>FADS2</i>  | a | 0.9216 | 0.1718  | 0.032  | 8.14E-08 | 0.6893 | 0.177   | 0.0453 | 9.20E-05 |



|            |                |   |        |         |        |          |        |          |        |          |
|------------|----------------|---|--------|---------|--------|----------|--------|----------|--------|----------|
| rs2298095  | <i>LPGAT1</i>  | t | 0.1007 | -0.1612 | 0.0301 | 8.29E-08 | 0.1359 | -0.0522  | 0.0552 | 0.3442   |
| rs12566620 | <i>LPGAT1</i>  | t | 0.9005 | 0.1665  | 0.0312 | 9.63E-08 | 0.8642 | 0.0513   | 0.0553 | 0.3529   |
| rs422249   | <i>FADS3</i>   | t | 0.329  | -0.1071 | 0.0202 | 1.09E-07 | 0.061  | -0.2503  | 0.1104 | 0.0234   |
| rs6687351  | <i>ALG14</i>   | a | 0.1876 | -0.1351 | 0.0254 | 1.09E-07 | 0.1012 | 0.1545   | 0.0665 | 0.02007  |
| rs2526678  | <i>FADS2</i>   | a | 0.0743 | -0.185  | 0.0348 | 1.10E-07 | 0.3195 | -0.1854  | 0.0483 | 0.000126 |
| rs17018028 | <i>LPGAT1</i>  | t | 0.0964 | -0.1726 | 0.0326 | 1.19E-07 | 0.1356 | -0.0506  | 0.0552 | 0.3593   |
| rs6662345  | <i>ALG14</i>   | t | 0.1878 | -0.1346 | 0.0254 | 1.20E-07 | 0.1012 | 0.1546   | 0.0665 | 0.02002  |
| rs12129315 | <i>LPGAT1</i>  | a | 0.8968 | 0.164   | 0.031  | 1.24E-07 | 0.8658 | 0.0487   | 0.0553 | 0.3784   |
| rs6679106  | <i>ALG14</i>   | a | 0.8126 | 0.1346  | 0.0255 | 1.24E-07 | 0.8988 | -0.1545  | 0.0665 | 0.02008  |
| rs12565318 | <i>LPGAT1</i>  | a | 0.8971 | 0.1638  | 0.031  | 1.26E-07 | 0.8659 | 0.0488   | 0.0553 | 0.3777   |
| rs12565546 | <i>LPGAT1</i>  | a | 0.1026 | -0.1637 | 0.031  | 1.28E-07 | 0.135  | -0.0476  | 0.0553 | 0.3886   |
| rs12145721 | <i>LPGAT1</i>  | t | 0.0998 | -0.1587 | 0.0301 | 1.29E-07 | 0.1346 | -0.048   | 0.0553 | 0.3847   |
| rs12138283 | <i>LPGAT1</i>  | a | 0.1026 | -0.1652 | 0.0313 | 1.30E-07 | 0.1352 | -0.0469  | 0.0552 | 0.3957   |
| rs11119814 | <i>LPGAT1</i>  | a | 0.8972 | 0.1648  | 0.0312 | 1.31E-07 | 0.8657 | 0.0482   | 0.0553 | 0.3828   |
| rs12125042 | <i>LPGAT1</i>  | a | 0.8972 | 0.1648  | 0.0312 | 1.31E-07 | 0.8657 | 0.0484   | 0.0553 | 0.3815   |
| rs11119816 | <i>LPGAT1</i>  | a | 0.9003 | 0.1597  | 0.0303 | 1.37E-07 | 0.8664 | 0.0495   | 0.0553 | 0.3701   |
| rs12564498 | <i>LPGAT1</i>  | t | 0.9004 | 0.1641  | 0.0312 | 1.39E-07 | 0.8656 | 0.0481   | 0.0553 | 0.3845   |
| rs12136792 | <i>LPGAT1</i>  | t | 0.9003 | 0.16    | 0.0304 | 1.41E-07 | 0.8654 | 0.0486   | 0.0553 | 0.3797   |
| rs12123135 | <i>LPGAT1</i>  | a | 0.9001 | 0.164   | 0.0312 | 1.45E-07 | 0.8647 | 0.0469   | 0.0552 | 0.3957   |
| rs12562791 | <i>LPGAT1</i>  | c | 0.9    | 0.1586  | 0.0302 | 1.46E-07 | 0.8655 | 0.0487   | 0.0553 | 0.3779   |
| rs4132401  | <i>LPGAT1</i>  | c | 0.9003 | 0.1588  | 0.0302 | 1.46E-07 | 0.8663 | 0.0499   | 0.0553 | 0.3664   |
| rs12123889 | <i>LPGAT1</i>  | t | 0.0979 | -0.1703 | 0.0324 | 1.48E-07 | 0.1356 | -0.0506  | 0.0552 | 0.3597   |
| rs17018048 | <i>LPGAT1</i>  | a | 0.0977 | -0.1704 | 0.0324 | 1.48E-07 | 0.1356 | -0.0506  | 0.0552 | 0.3596   |
| rs1065607  | <i>LPGAT1</i>  | t | 0.8999 | 0.1639  | 0.0312 | 1.51E-07 | 0.8656 | 0.0481   | 0.0553 | 0.3843   |
| rs1887094  | <i>CNN3</i>    | c | 0.5414 | 0.0981  | 0.0188 | 1.72E-07 | 0.7372 | 0.0058   | 0.0459 | 0.8998   |
| rs4615892  | <i>ALG14</i>   | t | 0.1744 | -0.1249 | 0.0239 | 1.77E-07 | 0.1014 | 0.1571   | 0.0661 | 0.01742  |
| rs1265168  | <i>CNN3</i>    | t | 0.8266 | 0.1333  | 0.0256 | 1.90E-07 | 0.76   | 0.0596   | 0.0477 | 0.2117   |
| rs7417186  | <i>ALG14</i>   | t | 0.174  | -0.1243 | 0.0239 | 1.92E-07 | 0.1014 | 0.1573   | 0.0661 | 0.01723  |
| rs1414904  | <i>TMEM56</i>  | t | 0.2876 | -0.1035 | 0.0202 | 3.15E-07 | 0.6221 | -0.0639  | 0.0422 | 0.1297   |
| rs174449   | <i>FADS3</i>   | a | 0.6392 | 0.0969  | 0.019  | 3.32E-07 | 0.7418 | 0.0947   | 0.0474 | 0.04593  |
| rs742614   | <i>CHMP4B</i>  | a | 0.4391 | -0.095  | 0.0186 | 3.37E-07 | 0.4131 | 0.0089   | 0.0421 | 0.8322   |
| rs174448   | <i>FADS3</i>   | a | 0.6398 | 0.0971  | 0.0191 | 3.53E-07 | 0.7841 | 0.0843   | 0.052  | 0.1049   |
| rs6593594  | <i>TMEM56</i>  | t | 0.2869 | -0.1024 | 0.0201 | 3.65E-07 | 0.6224 | -0.0619  | 0.0422 | 0.1419   |
| rs11165334 | <i>TMEM56</i>  | a | 0.7133 | 0.1011  | 0.0199 | 4.00E-07 | 0.377  | 0.0634   | 0.0421 | 0.1319   |
| rs12123355 | <i>LPGAT1</i>  | a | 0.908  | 0.1635  | 0.0323 | 4.20E-07 | 0.8744 | 0.0372   | 0.0583 | 0.5232   |
| rs11165336 | <i>TMEM56</i>  | t | 0.7128 | 0.1009  | 0.02   | 4.80E-07 | 0.3774 | 0.0632   | 0.0421 | 0.1333   |
| rs11165338 | <i>TMEM56</i>  | t | 0.7127 | 0.1006  | 0.0201 | 5.34E-07 | 0.3776 | 0.0627   | 0.0421 | 0.1365   |
| rs12239887 | <i>ALG14</i>   | a | 0.2163 | -0.1176 | 0.0237 | 7.08E-07 | NA     | NA       | NA     | NA       |
| rs4364936  | <i>LPGAT1</i>  | t | 0.8911 | 0.1486  | 0.0301 | 8.16E-07 | 0.8657 | 0.0546   | 0.0556 | 0.3264   |
| rs10874924 | <i>RWDD3</i>   | t | 0.4448 | -0.0941 | 0.0192 | 9.18E-07 | 0.4046 | 2.00E-04 | 0.0432 | 0.9963   |
| rs174579   | <i>FADS2</i>   | t | 0.2203 | -0.1152 | 0.0238 | 1.23E-06 | 0.113  | -0.0876  | 0.0674 | 0.1941   |
| rs736264   | <i>CHMP4B</i>  | t | 0.4607 | -0.0886 | 0.0183 | 1.26E-06 | 0.4147 | 0.0106   | 0.0416 | 0.799    |
| rs11590093 | <i>ALG14</i>   | a | 0.1382 | -0.1385 | 0.0287 | 1.36E-06 | NA     | NA       | NA     | NA       |
| rs11120822 | <i>CAMTA1</i>  | c | 0.3731 | 0.0931  | 0.0193 | 1.44E-06 | 0.553  | 0.0449   | 0.0423 | 0.2891   |
| rs4436414  | <i>CAMTA1</i>  | a | 0.3932 | 0.0903  | 0.0189 | 1.85E-06 | 0.5545 | 0.0466   | 0.0412 | 0.2586   |
| rs11807661 | <i>CNN3</i>    | a | 0.8585 | 0.1254  | 0.0263 | 1.86E-06 | NA     | NA       | NA     | NA       |
| rs7414485  | <i>CAMTA1</i>  | a | 0.3934 | 0.0901  | 0.0189 | 1.89E-06 | 0.554  | 0.0469   | 0.0412 | 0.255    |
| rs174532   | <i>C11orf9</i> | a | 0.314  | 0.1142  | 0.0241 | 2.11E-06 | NA     | NA       | NA     | NA       |

|            |                  |   |        |         |        |          |        |         |        |         |
|------------|------------------|---|--------|---------|--------|----------|--------|---------|--------|---------|
| rs6057930  | <i>CHMP4B</i>    | t | 0.5429 | 0.086   | 0.0181 | 2.15E-06 | 0.583  | -0.0121 | 0.0411 | 0.7692  |
| rs6057929  | <i>CHMP4B</i>    | a | 0.4568 | -0.0857 | 0.0182 | 2.38E-06 | 0.4163 | 0.0101  | 0.0411 | 0.8063  |
| rs6057924  | <i>CHMP4B</i>    | t | 0.454  | -0.0852 | 0.0184 | 3.52E-06 | 0.4033 | 0.0152  | 0.0412 | 0.7127  |
| rs4555772  | <i>GCNT4</i>     | a | 0.6084 | 0.0888  | 0.0192 | 3.93E-06 | 0.5948 | 0.0236  | 0.0414 | 0.5686  |
| rs12098564 | <i>GRID1</i>     | a | 0.9822 | -0.435  | 0.0944 | 4.07E-06 | NA     | NA      | NA     | NA      |
| rs412334   | <i>FEN1</i>      | t | 0.1591 | 0.1413  | 0.0307 | 4.08E-06 | NA     | NA      | NA     | NA      |
| rs16949516 | <i>MCTP2</i>     | t | 0.9427 | -0.2015 | 0.0438 | 4.12E-06 | 0.9706 | 0.142   | 0.1138 | 0.212   |
| rs12440212 | <i>MCTP2</i>     | a | 0.9436 | -0.2101 | 0.0456 | 4.15E-06 | 0.9699 | 0.1428  | 0.1134 | 0.2082  |
| rs174585   | <i>FADS2</i>     | a | 0.2223 | -0.114  | 0.0248 | 4.36E-06 | 0.1169 | -0.0992 | 0.0684 | 0.1468  |
| rs12442726 | <i>MCTP2</i>     | t | 0.9433 | -0.2105 | 0.0458 | 4.37E-06 | 0.9696 | 0.1374  | 0.1134 | 0.2257  |
| rs16949491 | <i>MCTP2</i>     | a | 0.0565 | 0.2101  | 0.0457 | 4.38E-06 | 0.0304 | -0.1387 | 0.1134 | 0.2215  |
| rs12134748 | <i>RWDD3</i>     | a | 0.5065 | 0.0868  | 0.0189 | 4.45E-06 | 0.4925 | -0.0473 | 0.0422 | 0.2621  |
| rs7550711  | <i>GPR61</i>     | t | 0.0301 | 0.2743  | 0.0601 | 4.94E-06 | NA     | NA      | NA     | NA      |
| rs12386586 | <i>PLXNA4</i>    | c | 0.917  | -0.1762 | 0.0387 | 5.35E-06 | 0.9667 | 0.0621  | 0.1122 | 0.5799  |
| rs7700719  | <i>GCNT4</i>     | a | 0.5037 | 0.0885  | 0.0195 | 5.75E-06 | 0.2872 | 0.0164  | 0.0485 | 0.7351  |
| rs174589   | <i>FADS2</i>     | c | 0.7835 | 0.1111  | 0.0246 | 6.08E-06 | 0.8889 | 0.0998  | 0.0688 | 0.147   |
| rs174455   | <i>FADS3</i>     | a | 0.6383 | 0.0866  | 0.0192 | 6.27E-06 | 0.6894 | 0.1106  | 0.0451 | 0.01416 |
| rs12386585 | <i>PLXNA4</i>    | c | 0.917  | -0.1749 | 0.0387 | 6.37E-06 | 0.9666 | 0.0621  | 0.1124 | 0.5805  |
| rs4531856  | <i>JUND</i>      | t | 0.6443 | -0.0927 | 0.0206 | 6.69E-06 | 0.796  | 0.0596  | 0.05   | 0.2331  |
| rs2198309  | <i>AGBL1</i>     | t | 0.9866 | 0.6092  | 0.1355 | 6.88E-06 | NA     | NA      | NA     | NA      |
| rs12665473 | <i>LOC389435</i> | t | 0.2228 | 0.1031  | 0.023  | 7.09E-06 | 0.1269 | 0.06    | 0.0614 | 0.329   |
| rs4703642  | <i>GCNT4</i>     | a | 0.4601 | 0.0822  | 0.0184 | 7.69E-06 | 0.2528 | 0.0249  | 0.0475 | 0.5999  |
| rs12724564 | <i>INTS7</i>     | a | 0.1022 | -0.1354 | 0.0303 | 8.02E-06 | 0.1232 | -0.0187 | 0.0591 | 0.7523  |
| rs9871800  | <i>SLC4A7</i>    | a | 0.0286 | 0.3385  | 0.0759 | 8.24E-06 | NA     | NA      | NA     | NA      |
| rs4392602  | <i>GCNT4</i>     | t | 0.5406 | -0.0818 | 0.0184 | 8.38E-06 | 0.747  | -0.0252 | 0.0476 | 0.5969  |
| rs9787424  | <i>PNLIPRP2</i>  | a | 0.6015 | -0.0884 | 0.0199 | 9.12E-06 | 0.7251 | -0.1227 | 0.046  | 0.00759 |
| rs968567   | <i>FADS2</i>     | t | 0.1624 | -0.1101 | 0.0248 | 9.22E-06 | NA     | NA      | NA     | NA      |
| rs12735358 | <i>INTS7</i>     | a | 0.0992 | -0.1383 | 0.0312 | 9.40E-06 | 0.1197 | -0.0227 | 0.0614 | 0.7117  |
| rs273506   | <i>MAST3</i>     | t | 0.4395 | 0.0863  | 0.0195 | 9.59E-06 | 0.3354 | 0.057   | 0.0435 | 0.1899  |
| rs4074964  | <i>CAMTA1</i>    | a | 0.7233 | -0.0907 | 0.0205 | 9.77E-06 | 0.689  | -0.0731 | 0.0432 | 0.09044 |
| rs4254438  | <i>JUND</i>      | t | 0.3584 | -0.0852 | 0.0193 | 9.92E-06 | 0.3866 | -0.0126 | 0.04   | 0.7523  |
| rs870985   | <i>RWDD3</i>     | t | 0.4274 | -0.082  | 0.0186 | 9.99E-06 | 0.4085 | 0.0415  | 0.0424 | 0.3273  |
| rs12608504 | <i>JUND</i>      | a | 0.373  | 0.0866  | 0.0196 | 1.02E-05 | 0.2045 | -0.059  | 0.0497 | 0.2357  |
| rs12755326 | <i>TMEM56</i>    | a | 0.181  | -0.1036 | 0.0235 | 1.05E-05 | 0.0733 | 0.1564  | 0.0788 | 0.04707 |
| rs7474885  | <i>GRID1</i>     | a | 0.0173 | 0.4032  | 0.0916 | 1.08E-05 | NA     | NA      | NA     | NA      |
| rs12239725 | <i>TMEM56</i>    | a | 0.819  | 0.1034  | 0.0235 | 1.10E-05 | 0.9257 | -0.1634 | 0.0793 | 0.03939 |
| rs1637053  | <i>CDCA7L</i>    | t | 0.4617 | -0.0935 | 0.0213 | 1.10E-05 | 0.3213 | 0.0227  | 0.0576 | 0.6935  |
| rs2186090  | <i>CAMTA1</i>    | t | 0.2971 | 0.0899  | 0.0205 | 1.15E-05 | 0.3477 | 0.0459  | 0.0424 | 0.2794  |
| rs7525119  | <i>CAMTA1</i>    | t | 0.297  | 0.0898  | 0.0205 | 1.17E-05 | 0.3465 | 0.048   | 0.0422 | 0.2554  |
| rs1053538  | <i>TNRC5</i>     | c | 0.504  | -0.0807 | 0.0184 | 1.20E-05 | 0.7186 | -0.0084 | 0.0447 | 0.8503  |
| rs9324353  | <i>RWDD3</i>     | a | 0.4281 | -0.0814 | 0.0186 | 1.20E-05 | 0.4097 | 0.0413  | 0.0423 | 0.3279  |
| rs6700922  | <i>CAMTA1</i>    | a | 0.2302 | 0.1017  | 0.0232 | 1.22E-05 | 0.5507 | -0.0136 | 0.0416 | 0.7445  |
| rs6941212  | <i>TNRC5</i>     | t | 0.5422 | -0.0798 | 0.0183 | 1.24E-05 | 0.8943 | -0.023  | 0.0624 | 0.712   |
| rs10157405 | <i>TMEM56</i>    | t | 0.8191 | 0.1026  | 0.0235 | 1.25E-05 | 0.9262 | -0.1604 | 0.0785 | 0.04114 |
| rs1339911  | <i>GRID1</i>     | t | 0.0173 | 0.3947  | 0.0904 | 1.27E-05 | NA     | NA      | NA     | NA      |
| rs1075403  | <i>KIAA1683</i>  | t | 0.3734 | 0.0871  | 0.02   | 1.32E-05 | 0.2051 | -0.0748 | 0.0537 | 0.164   |
| rs12783584 | <i>PNLIPRP2</i>  | t | 0.5893 | -0.09   | 0.0207 | 1.32E-05 | 0.7119 | -0.1151 | 0.0456 | 0.0116  |
| rs3890845  | <i>ALG14</i>     | t | 0.6411 | 0.0875  | 0.0201 | 1.35E-05 | 0.283  | 0.0937  | 0.0449 | 0.03677 |

|            |                 |   |        |         |        |          |        |         |        |         |
|------------|-----------------|---|--------|---------|--------|----------|--------|---------|--------|---------|
| rs4704183  | <i>GCNT4</i>    | c | 0.6505 | 0.083   | 0.0191 | 1.35E-05 | 0.5374 | 0.0497  | 0.04   | 0.214   |
| rs10746465 | <i>CAMTA1</i>   | a | 0.3037 | 0.089   | 0.0205 | 1.37E-05 | 0.3005 | 0.0439  | 0.0446 | 0.3251  |
| rs3763236  | <i>TNRC5</i>    | t | 0.504  | -0.0801 | 0.0184 | 1.37E-05 | 0.7183 | -0.0113 | 0.0445 | 0.7999  |
| rs11086102 | <i>JUND</i>     | c | 0.6258 | -0.0857 | 0.0197 | 1.38E-05 | 0.7947 | 0.0633  | 0.0499 | 0.2038  |
| rs28104    | <i>CAST</i>     | t | 0.1043 | -0.1544 | 0.0356 | 1.48E-05 | 0.2936 | -0.0127 | 0.0458 | 0.7824  |
| rs12134529 | <i>INTS7</i>    | a | 0.1029 | -0.1308 | 0.0302 | 1.51E-05 | 0.1232 | -0.0182 | 0.0591 | 0.7583  |
| rs6113592  | <i>FOXA2</i>    | a | 0.6182 | 0.0853  | 0.0198 | 1.58E-05 | 0.7486 | 0.0097  | 0.0449 | 0.8284  |
| rs10510024 | <i>PNLIPRP2</i> | c | 0.4292 | 0.0854  | 0.0198 | 1.59E-05 | 0.6713 | 0.0074  | 0.0449 | 0.8688  |
| rs6601299  | <i>PPP1R3B</i>  | t | 0.0932 | -0.1309 | 0.0303 | 1.59E-05 | NA     | NA      | NA     | NA      |
| rs7327257  | <i>UGCGL2</i>   | t | 0.0212 | -0.3895 | 0.0904 | 1.63E-05 | 0.1468 | -0.0936 | 0.0555 | 0.09167 |
| rs6047978  | <i>FOXA2</i>    | a | 0.6196 | 0.0852  | 0.0198 | 1.64E-05 | 0.752  | 0.011   | 0.0447 | 0.8047  |
| rs10157254 | <i>TMEM56</i>   | a | 0.8111 | 0.1017  | 0.0236 | 1.70E-05 | 0.9265 | -0.1563 | 0.0786 | 0.04674 |
| rs7736223  | <i>GCNT4</i>    | t | 0.5546 | -0.0798 | 0.0186 | 1.82E-05 | 0.7469 | -0.0254 | 0.0476 | 0.5943  |

SNP Single nucleotide polymorphism, EAF Effect allele frequency

<sup>a</sup> These results in European ancestry populations have been published previously by Wu et al.

<sup>b</sup> Regression coefficient associated with one copy of the effect allele.

**Supplemental Table 11** Associations with lipid profiles in the NHAPC study

| Lipids (mmol/L)      | rs11589386          |          | rs11042834          |          | rs17159388          |          |
|----------------------|---------------------|----------|---------------------|----------|---------------------|----------|
|                      | Beta (SE)           | <i>P</i> | Beta (SE)           | <i>P</i> | Beta (SE)           | <i>P</i> |
| Triglyceride         |                     |          |                     |          |                     |          |
| Model 1 <sup>a</sup> | -0.0297<br>(0.0308) | 0.3347   | 0.0253<br>(0.0274)  | 0.3555   | 0.0229<br>(0.0223)  | 0.3037   |
| Model 2 <sup>b</sup> | -0.0259<br>(0.0309) | 0.4019   | 0.0315<br>(0.0274)  | 0.2506   | -0.0270<br>(0.0213) | 0.2061   |
| Total cholesterol    |                     |          |                     |          |                     |          |
| Model 1 <sup>a</sup> | -0.0834<br>(0.0479) | 0.0816   | -0.0347<br>(0.0426) | 0.4151   | -0.0306<br>(0.0346) | 0.3775   |
| Model 2 <sup>b</sup> | -0.0924<br>(0.0484) | 0.0564   | -0.0325<br>(0.0429) | 0.4488   | -0.0555<br>(0.0351) | 0.1147   |
| HDL-c                |                     |          |                     |          |                     |          |
| Model 1 <sup>a</sup> | 0.0007<br>(0.0168)  | 0.9655   | -0.0359<br>(0.0149) | 0.0162   | -0.0292<br>(0.0121) | 0.0161   |
| Model 2 <sup>b</sup> | -0.0016<br>(0.0169) | 0.9244   | -0.0366<br>(0.0150) | 0.0147   | -0.0176<br>(0.0122) | 0.1488   |
| LDL-c                |                     |          |                     |          |                     |          |
| Model 1 <sup>a</sup> | -0.0862<br>(0.0480) | 0.0727   | -0.0048<br>(0.0427) | 0.9100   | -0.0141<br>(0.0349) | 0.6870   |
| Model 2 <sup>b</sup> | -0.0965<br>(0.0485) | 0.0470   | -0.0046<br>(0.0430) | 0.9142   | -0.0272<br>(0.0356) | 0.4443   |

NHAPC Nutrition and Health of Aging Population in China study

<sup>a</sup> Model 1 data were adjusted for age, gender, region, and the first two principle components.

<sup>b</sup> Model 2 data were further adjusted for 14:0 (for rs11589386 and rs11042834) and 20:0 (for rs17159388) based on Model 1
